# Supplementary material for: Design, synthesis, anticancer activity, molecular docking and ADME studies of novel methylsulfonyl indole-benzimidazoles in comparison with ethylsulfonyl counterparts
Source: Royal Society of Chemistry journal article supplement (doi:10.1039/d1nj01019k), 2021-01-01
Supplement: d1nj01019k1.pdf [file d1nj01019k1.pdf]

## Design, Synthesis, Anticancer Activity, Molecular Docking and ADME Studies of Novel Methylsulfonyl Indole-benzimidazoles in Comparison with Ethylsulfonyl Counterparts

### Supplementary Data

**Suppl.Table 1.** % Viability scores of triplicates and statistical significance obtained by one-way ANOVA/Dunnett statistics with respect to the DMSO control samples for each experimental group (\*).

|    | Compound | Rep1 (%) | Rep2 (%) | Rep3 (%) | Mean (%) | Adj. P-val | Experimental group |
|----|----------|----------|----------|----------|----------|------------|--------------------|
| 1  | 23       | 71.28    | 85.7     | 77.5     | 78.16    | 0.0013     | A                  |
| 2  | 24       | 54.25    | 51.26    | 51.76    | 52.42    | < 0.0001   | A                  |
| 3  | 25       | 74.64    | 78.99    | 78.24    | 77.29    | 0.0008     | A                  |
| 4  | 26       | 31.87    | 29.76    | 31.37    | 31       | < 0.0001   | A                  |
| 5  | 27       | 50.89    | 49.68    | 45.04    | 48.54    | < 0.0001   | B                  |
| 6  | 28       | 98.02    | 97.59    | 102.06   | 99.23    | > 0.9999   | B                  |
| 7  | 29       | 56.39    | 50.11    | 50.97    | 52.49    | < 0.0001   | B                  |
| 8  | 30       | 52.61    | 54.67    | 51.58    | 52.95    | < 0.0001   | B                  |
| 9  | 31       | 42.44    | 43.93    | 45.42    | 43.93    | < 0.0001   | A                  |
| 10 | 32       | 93.12    | 88.39    | 92.6     | 91.37    | 0.9621     | B                  |
| 11 | 33       | 84.26    | 77.72    | 71.62    | 77.87    | 0.0702     | B                  |
| 12 | 34       | 52.52    | 51.15    | 50.29    | 51.32    | < 0.0001   | B                  |
| 13 | 35       | 106.71   | 103.36   | 98.76    | 102.94   | 0.9991     | A                  |
| 14 | 36       | 49.77    | 40.32    | 45.92    | 45.34    | < 0.0001   | A                  |
| 15 | 37       | 90.37    | 88.82    | 87.61    | 88.93    | 0.8268     | B                  |
| 16 | 38       | 89.25    | 90.8     | 86.93    | 88.99    | 0.8307     | B                  |
| 17 | 39       | 46.17    | 43.31    | 40.82    | 43.43    | < 0.0001   | A                  |
| 18 | 40       | 73.25    | 75.66    | 70.76    | 73.22    | 0.0139     | B                  |
| 19 | 41       | 63.57    | 58.85    | 56.73    | 59.72    | < 0.0001   | A                  |
| 20 | 42       | 89.56    | 99.25    | 79.36    | 89.39    | 0.3467     | A                  |
| 21 | 43       | 45.79    | 41.19    | 43.93    | 43.64    | < 0.0001   | A                  |
| 22 | 44       | 70.33    | 66.46    | 56.91    | 64.56    | 0.0003     | B                  |
| 23 | 45       | 98.41    | 102.04   | 99.29    | 99.91    | > 0.9999   | C                  |

|    |             |        |        |        |       |          |   |
|----|-------------|--------|--------|--------|-------|----------|---|
| 24 | 46          | 83.62  | 90.09  | 89.82  | 87.84 | 0.0148   | C |
| 25 | 47          | 81.59  | 88.32  | 83.18  | 84.36 | 0.0014   | C |
| 26 | 48          | 42.64  | 42.2   | 42.55  | 42.46 | < 0.0001 | C |
| 27 | 49          | 74.24  | 76.19  | 72.2   | 74.21 | < 0.0001 | C |
| 28 | 50          | 41.57  | 44.92  | 38.96  | 41.82 | < 0.0001 | A |
| 29 | 51          | 56.61  | 54     | 49.52  | 53.38 | < 0.0001 | A |
| 30 | 52          | 72.99  | 58.37  | 49.43  | 60.26 | < 0.0001 | B |
| 31 | 53          | 70.24  | 64.65  | 50.63  | 61.84 | < 0.0001 | B |
| 32 | 54          | 54.5   | 45.99  | 35.06  | 45.18 | < 0.0001 | B |
| 33 | 55          | 49.43  | 49.77  | 36.01  | 45.07 | < 0.0001 | B |
| 34 | 56          | 80.61  | 78.93  | 70.61  | 76.72 | < 0.0001 | C |
| 35 | 57          | 79.64  | 76.54  | 75.66  | 77.28 | < 0.0001 | C |
| 36 | 58          | 79.11  | 88.49  | 90.09  | 85.9  | 0.0038   | C |
| -- | DMSO (%0.1) | 99.75  | 110.32 | 89.93  | 100   | --       | A |
| -- | DMSO (%0.1) | 99.48  | 94.50  | 106.02 | 100   | --       | B |
| -- | DMSO (%0.1) | 102.57 | 93.98  | 103.45 | 100   | --       | C |

\*: Significance scores are derived from log<sub>2</sub> scaled viability percentiles and one-way ANOVA/Dunnett statistics. The analyses were separately performed for each experimental group/batch, by taking their respective DMSO control values into account.

**Suppl. Table 2.** Docking scores and SwissADME results of methylsulfonyl indole-benzimidazole derivatives, CPT and BZ.

| NO | Docking score (kcal/mol) | Count of H-bond acceptors/donors | Number of rotatable bonds | Consensus Computational LogP | Lipinski Violations        | Muegge Filter Violations | Leadlikeness              |
|----|--------------------------|----------------------------------|---------------------------|------------------------------|----------------------------|--------------------------|---------------------------|
| 23 | -8.2                     | 3/1                              | 2                         | 0.92                         | 0                          | 0                        | Yes                       |
| 24 | -7.6                     | 4/1                              | 3                         | 1.81                         | 0                          | 0                        | No, MW>350                |
| 25 | -7.7                     | 3/1                              | 2                         | 2.35                         | 0                          | 0                        | No, MW>350                |
| 26 | -7.8                     | 3/1                              | 2                         | 2.42                         | 0                          | 0                        | No, MW>350                |
| 27 | -8.2                     | 3/1                              | 3                         | 2.14                         | 0                          | 0                        | Yes                       |
| 28 | -7.5                     | 4/1                              | 4                         | 2.09                         | 0                          | 0                        | No; MW>350                |
| 29 | -7.5                     | 3/1                              | 3                         | 2.63                         | 0                          | 0                        | No; MW>350                |
| 30 | -7.7                     | 3/1                              | 3                         | 2.63                         | 0                          | 0                        | No; MW>350                |
| 31 | -7.5                     | 3/1                              | 4                         | 2.45                         | 0                          | 0                        | No; MW>350                |
| 32 | -7.5                     | 4/1                              | 5                         | 2.39                         | 0                          | 0                        | No; MW>350                |
| 33 | -7.6                     | 3/1                              | 4                         | 2.93                         | 0                          | 0                        | No; MW>350<br>XLOGP3>3.5  |
| 34 | -7.4                     | 3/1                              | 4                         | 3.00                         | 0                          | 0                        | No; MW>350,<br>XLOGP3>3.5 |
| 35 | -7.4                     | 4/1                              | 6                         | 2.67                         | 0                          | 0                        | No; MW>350                |
| 36 | -7.6                     | 3/1                              | 5                         | 3.21                         | 0                          | 0                        | No; MW>350,<br>XLOGP3>3.5 |
| 37 | -7.6                     | 3/1                              | 5                         | 3.27                         | 0                          | 0                        | No; MW>350,<br>XLOGP3>3.5 |
| 38 | -8.6                     | 3/1                              | 5                         | 3.27                         | 0                          | 0                        | No; MW>350,<br>XLOGP3>3.5 |
| 39 | -8.6                     | 3/1                              | 5                         | 3.27                         | 0                          | 0                        | No; MW>350,<br>XLOGP3>3.5 |
| 40 | -8.8                     | 3/1                              | 3                         | 3.53                         | 0                          | 0                        | No; MW>350,<br>XLOGP3>3.5 |
| 41 | -8.0                     | 3/1                              | 3                         | 3.60                         | 0                          | 0                        | No; MW>350,<br>XLOGP3>3.5 |
| 42 | -8.9                     | 3/1                              | 4                         | 3.00                         | 0                          | 0                        | No; MW>350,<br>XLOGP3>3.5 |
| 43 | -8.1                     | 4/1                              | 5                         | 2.94                         | 0                          | 0                        | No; MW>350,<br>XLOGP3>3.5 |
| 44 | -8.3                     | 3/1                              | 4                         | 3.48                         | 0                          | 0                        | No; MW>350,<br>XLOGP3>3.5 |
| 45 | -8.4                     | 4/1                              | 4                         | 3.29                         | 0                          | 0                        | No; MW>350,<br>XLOGP3>3.5 |
| 46 | -8.5                     | 4/1                              | 4                         | 3.77                         | 1 violation:<br>MLOGP>4.15 | 0                        | No; MW>350,<br>XLOGP3>3.5 |
| 47 | -8.4                     | 4/1                              | 4                         | 3.83                         | 1 violation:<br>MLOGP>4.15 | 0                        | No; MW>350,<br>XLOGP3>3.5 |
| 48 | -9.1                     | 5/1                              | 4                         | 3.58                         | 0                          | 0                        | No; MW>350,               |

|     |       |     |   |      |                                        |                          |                           |
|-----|-------|-----|---|------|----------------------------------------|--------------------------|---------------------------|
|     |       |     |   |      |                                        |                          | XLOGP3>3.5                |
| 49  | -8.5  | 6/1 | 5 | 3.52 | 0                                      | 0                        | No; MW>350,<br>XLOGP3>3.5 |
| 50  | -8.9  | 5/1 | 4 | 4.06 | 0                                      | 0                        | No; MW>350,<br>XLOGP3>3.5 |
| 51  | -8.6  | 5/1 | 4 | 4.12 | 2 violations:<br>MW>500,<br>MLOGP>4.15 | 0                        | No; MW>350,<br>XLOGP3>3.5 |
| 52  | -8.3  | 3/1 | 4 | 3.48 | 0                                      | 0                        | No; MW>350,<br>XLOGP3>3.5 |
| 53  | -8.4  | 4/1 | 5 | 3.42 | 0                                      | 0                        | No; MW>350,<br>XLOGP3>3.5 |
| 54  | -8.4  | 3/1 | 4 | 3.96 | 1 violation:<br>MLOGP>4.15             | 1 violation:<br>XLOGP3>5 | No; MW>350,<br>XLOGP3>3.5 |
| 55  | -8.5  | 3/1 | 4 | 4.02 | 2 violations:<br>MW>500,<br>MLOGP>4.15 | 1 violation:<br>XLOGP3>5 | No; MW>350,<br>XLOGP3>3.5 |
| 56  | -8.5  | 3/1 | 4 | 3.96 | 1 violation:<br>MLOGP>4.15             | 1 violation:<br>XLOGP3>5 | No; MW>350,<br>XLOGP3>3.5 |
| 57  | -8.5  | 3/1 | 4 | 4.43 | 2 violations:<br>MW>500,<br>MLOGP>4.15 | 1 violation:<br>XLOGP3>5 | No; MW>350,<br>XLOGP3>3.5 |
| 58  | -8.1  | 3/1 | 4 | 4.50 | 2 violations:<br>MW>500,<br>MLOGP>4.15 | 1 violation:<br>XLOGP3>5 | No; MW>350,<br>XLOGP3>3.5 |
| CPT | -8.5  | 5/1 | 1 | 2.20 | 0                                      | 0                        | Yes                       |
| BZ  | -10.7 | 4/2 | 7 | 5.07 | 0                                      | 1 violation:<br>XLOGP3>5 | No; MW>350,<br>XLOGP3>3.5 |

Suppl. Table 3. Physical and spectral data for compounds 23-58.

| Comp. | Mp (°C) | Formulas                                                                                                                                                                      | Yield (%) | <sup>1</sup> H- and <sup>13</sup> C-NMR (DMSO-d <sub>6</sub> ) δ ppm                                                                                                                                                                                                                                                                                                                                                                                                                                                                    | MS (ESI+) m/z | Isolation                                          |
|-------|---------|-------------------------------------------------------------------------------------------------------------------------------------------------------------------------------|-----------|-----------------------------------------------------------------------------------------------------------------------------------------------------------------------------------------------------------------------------------------------------------------------------------------------------------------------------------------------------------------------------------------------------------------------------------------------------------------------------------------------------------------------------------------|---------------|----------------------------------------------------|
| 23    | 249     | C <sub>17</sub> H <sub>15</sub> N <sub>3</sub> O <sub>5</sub> S <sub>0.25H2O</sub> ; C, 61.89; H, 4.73; N, 12.74; S, 9.70; Found: C, 61.77; H, 4.96; N, 13.05; S, 9.69.       | 9         | <sup>1</sup> H NMR: 6.322 (s, 3H), 4.04 (s, 3H), 7.17-7.26 (m, 2H), 7.51 (d, J=7.2 Hz, 1H), 7.75 (dd, J=8.8 Hz, J=1.6 Hz, 1H), 7.81 (d, J=8.8 Hz, 1H), 8.17-8.18 (m, 2H), 8.41 (d, J=7.2 Hz, 1H), 11.90 (brd s, 1H). <sup>13</sup> C NMR: 31.92, 44.22, 104.27, 110.28, 111.76, 117.33, 119.72, 120.43, 121.45, 122.46, 126.22, 127.66, 133.81, 136.01, 139.15, 142.40, 152.81.                                                                                                                                                         | 326           | CHCl <sub>3</sub> ; EtOAc; n-Hexane (2:2:1) cc     |
| 24    | 278     | C <sub>18</sub> H <sub>17</sub> N <sub>3</sub> O <sub>5</sub> S <sub>0.25H2O</sub> ; C, 60.21; H, 4.88; N, 11.71; S, 8.91; Found: C, 59.83; H, 4.86; N, 11.86; S, 8.91.       | 8         | <sup>1</sup> H NMR: 3.22 (s, 3H), 3.81 (s, 3H), 4.03 (s, 3H), 6.88 (dd, J=8.6 Hz, J=2.8 Hz, 1H), 7.41 (d, J=9.2 Hz, 1H), 7.74 (dd, J=8.6 Hz, J=2.8 Hz, 1H), 7.80 (d, J=8.0 Hz, 1H), 7.95 (d, J=2.8 Hz, 1H), 8.13 (d, J=2.8 Hz, 1H), 8.17 (d, J=1.6 Hz, 1H), 11.78 (brd d, 1H). <sup>13</sup> C NMR: 32.00, 44.30, 55.36, 103.23, 104.10, 110.26, 112.53, 112.68, 117.40, 119.72, 126.94, 128.04, 131.10, 133.81, 139.19, 142.44, 153.05, 154.52.                                                                                        | 356           | CHCl <sub>3</sub> ; EtOAc; n-Hexane (2:2:1) cc     |
| 25    | 280     | C <sub>17</sub> H <sub>14</sub> ClN <sub>3</sub> O <sub>5</sub> S <sub>0.65H2O</sub> ; C, 55.02; H, 4.15; N, 11.71; S, 8.91; Found: C, 54.70; H, 3.89; N, 11.67; S, 8.63.     | 28        | <sup>1</sup> H NMR: 3.25 (s, 3H), 4.08 (s, 3H), 7.28 (dd, J=8.4 Hz, J=2.0 Hz, 1H), 8.4 (d, J=8.4 Hz, 1H), 7.78 (dd, J=8.4 Hz, J=1.6 Hz, 1H), 7.85 (d, J=8.4 Hz, 1H), 8.25 (d, J=1.6 Hz, 1H), 8.31 (brd s, 1H), 8.52 (d, J=2.0 Hz, 1H), 12.13 (brd s, 1H). <sup>13</sup> C NMR: 31.99, 44.23, 104.11, 110.33, 113.41, 117.52, 119.80, 120.69, 122.54, 125.19, 127.38, 129.10, 133.95, 134.53, 139.06, 142.28, 152.21.                                                                                                                    | 360           | CHCl <sub>3</sub> ; EtOAc; n-Hexane (1:2:2) cc     |
| 26    | 265     | C <sub>17</sub> H <sub>14</sub> BrN <sub>3</sub> O <sub>5</sub> S; C, 50.51; H, 3.49; N, 10.39; S, 7.93; Found: C, 50.13; H, 3.62; N, 10.77; S, 7.92.                         | 22        | <sup>1</sup> H NMR: 3.25 (s, 3H), 4.08 (s, 3H), 7.39 (dd, J=8.4 Hz, J=2.0 Hz, 1H), 7.52 (d, J=8.4 Hz, 1H), 7.78 (dd, J=8.4 Hz, J=1.6 Hz, 1H), 7.85 (d, J=8.0 Hz, 1H), 8.25 (d, J=1.6 Hz, 1H), 8.29 (s, 1H), 8.67 (d, J=2.0 Hz, 1H), 12.13 (brd s, 1H). <sup>13</sup> C NMR: 31.99, 44.21, 104.06, 110.40, 113.28, 113.92, 117.61, 119.87, 123.77, 125.15, 128.07, 129.00, 134.03, 134.83, 139.13, 142.33, 152.24.                                                                                                                       | 404           | CHCl <sub>3</sub> ; EtOAc; n-Hexane (2:2:1) cc     |
| 27    | 311     | C <sub>18</sub> H <sub>17</sub> N <sub>3</sub> O <sub>5</sub> S <sub>0.35H2O</sub> ; C, 62.37; H, 5.18; N, 12.13; S, 9.23; Found: C, 62.10; H, 4.75; N, 12.53; S, 9.29.       | 34        | <sup>1</sup> H NMR: 1.41 (t, 3H), 3.25 (s, 3H), 4.57 (q, 2H), 7.19-7.28 (m, 2H), 7.55 (d, J=8.0 Hz, 1H), 7.78 (dd, J=8.4 Hz, J=1.6 Hz, 1H), 7.86 (d, J=8.0 Hz, 1H), 8.09 (d, J=3.2 Hz, 1H), 8.21 (d, J=1.6 Hz, 1H), 8.40 (d, J=7.6 Hz, 1H), 11.89 (brd s, 1H). <sup>13</sup> C NMR: 14.67, 44.29, 56.00, 104.13, 110.45, 111.86, 117.58, 119.97, 120.50, 121.49, 122.52, 126.43, 126.78, 134.04, 136.11, 138.28, 142.66, 151.95.                                                                                                        | 340           | CHCl <sub>3</sub> ; EtOAc; n-Hexane (2:2:1) cc     |
| 28    | 251     | C <sub>18</sub> H <sub>15</sub> N <sub>3</sub> O <sub>5</sub> S; C, 61.77; H, 5.18; N, 11.37; S, 8.68; Found: C, 61.76; H, 5.05; N, 11.70; S, 8.76.                           | 32        | <sup>1</sup> H NMR: 1.41 (t, 3H), 3.24 (s, 3H), 3.82 (s, 3H), 4.55 (q, 2H), 6.91 (dd, J=8.8 Hz, J=2.4 Hz, 1H), 7.44 (d, J=8.8 Hz, 1H), 7.77 (dd, J=8.4 Hz, J=1.6 Hz, 1H), 7.85 (d, J=8 Hz, 1H), 7.95 (d, J=2.4 Hz, 1H), 8.04 (s, 1H), 8.21 (d, J=1.6 Hz, 1H), 11.77 (brd s, 1H). <sup>13</sup> C NMR: 14.65, 39.21, 44.30, 55.35, 103.18, 103.89, 110.36, 112.57, 112.71, 117.58, 119.90, 127.07, 127.09, 131.14, 133.96, 138.27, 142.65, 152.13, 154.51.                                                                               | 370           | CHCl <sub>3</sub> ; EtOAc; n-Hexane (2:2:1) cc     |
| 29    | 298     | For C <sub>18</sub> H <sub>16</sub> ClN <sub>3</sub> O <sub>5</sub> S <sub>0.25H2O</sub> ; C, 57.20; H, 4.40; N, 11.12; S, 8.46; Found: C, 56.98; H, 4.56; N, 11.55; S, 8.66. | 47        | <sup>1</sup> H NMR: 1.42 (t, 3H), 3.25 (s, 3H), 4.58 (q, 2H), 7.28 (dd, J=8.4 Hz, J=2.4 Hz, 1H), 7.57 (d, J=8.4 Hz, 1H), 7.79 (dd, J=8.8 Hz, J=2.0 Hz, 1H), 7.87 (d, J=8.8 Hz, 1H), 8.21 (s, 1H), 8.27 (d, J=1.6 Hz, 1H), 8.50 (d, J=2.0 Hz, 1H), 12.10 (brd s, 1H). <sup>13</sup> C NMR: 14.64, 39.22, 44.22, 103.93, 110.46, 113.51, 117.75, 120.05, 120.79, 122.63, 125.27, 127.59, 128.27, 134.19, 134.63, 138.21, 142.52, 151.31.                                                                                                  | 374           | CHCl <sub>3</sub> ; EtOAc; n-Hexane (2:2:1) cc     |
| 30    | 288     | C <sub>18</sub> H <sub>15</sub> BrN <sub>3</sub> O <sub>5</sub> S <sub>0.15H2O</sub> ; C, 51.46; H, 3.91; N, 10.00; S, 7.61; Found: C, 51.02; H, 4.12; N, 10.43; S, 7.71.     | 56        | <sup>1</sup> H NMR: 1.42 (t, 3H), 3.25 (s, 3H), 4.08 (s, 3H), 7.39 (dd, J=8.4 Hz, J=2.0 Hz, 1H), 7.52 (d, J=8.4 Hz, 1H), 7.78 (dd, J=8.4 Hz, J=1.6 Hz, 1H), 7.85 (d, J=8.0 Hz, 1H), 8.25 (d, J=1.6 Hz, 1H), 8.29 (s, 1H), 8.67 (d, J=2.0 Hz, 1H), 12.13 (brd s, 1H). <sup>13</sup> C NMR: 31.99, 44.21, 104.06, 110.40, 113.28, 113.92, 117.61, 119.87, 123.77, 125.15, 128.07, 129.00, 134.03, 134.83, 139.13, 142.33, 152.24.                                                                                                         | 417           | CHCl <sub>3</sub> ; EtOAc; n-Hexane (2:2:1) cc     |
| 31    | 256     | C <sub>18</sub> H <sub>15</sub> N <sub>3</sub> O <sub>5</sub> S; C, 64.57; H, 5.42; N, 11.89; S, 9.07; Found: C, 64.32; H, 5.53; N, 12.02; S, 9.02.                           | 54        | <sup>1</sup> H NMR: 0.85 (t, 3H), 1.79 (m, 2H), 3.23 (s, 3H), 4.47 (t, 2H), 7.15-7.25 (m, 2H), 7.52 (d, J=8.0 Hz, 1H), 7.75 (dd, J=8.4 Hz, J=1.6 Hz, 1H), 7.85 (d, J=8.4 Hz, 1H), 8.05 (d, J=2.4 Hz, 1H), 8.18 (d, J=1.6 Hz, 1H), 8.36 (d, J=8.0 Hz, 1H), 11.83 (brd s, 1H). <sup>13</sup> C NMR: 10.85, 22.28, 44.19, 45.48, 104.20, 110.66, 111.79, 117.52, 119.86, 120.42, 121.39, 122.43, 126.40, 126.67, 133.92, 135.98, 138.73, 142.42, 152.15.                                                                                   | 354           | CHCl <sub>3</sub> ; EtOAc; n-Hexane (1:2:1) cc     |
| 32    | 244     | C <sub>18</sub> H <sub>15</sub> N <sub>3</sub> O <sub>5</sub> S; C, 62.64; H, 5.52; N, 10.96; S, 8.36; Found: C, 62.32; H, 5.55; N, 10.98; S, 8.26.                           | 37        | <sup>1</sup> H NMR: 0.87 (t, 3H), 1.79 (m, 2H), 3.22 (s, 3H), 3.79 (s, 3H), 4.46 (t, 2H), 6.88 (dd, J=8.8 Hz, J=2.4 Hz, 1H), 7.41 (d, J=9.2 Hz, 1H), 7.74 (dd, J=8.8 Hz, J=1.6 Hz, 1H), 7.84 (d, J=8.4 Hz, 1H), 7.92 (d, J=2.4 Hz, 1H), 8.00 (d, J=3.2 Hz, 1H), 8.18 (d, J=1.6 Hz, 1H), 11.70 (brd s, 1H). <sup>13</sup> C NMR: 10.92, 22.34, 44.27, 45.54, 55.33, 103.18, 104.02, 110.62, 112.55, 112.67, 117.58, 119.85, 127.04, 127.11, 131.07, 133.90, 138.79, 142.48, 152.36, 154.50.                                              | 384           | CHCl <sub>3</sub> ; EtOAc; n-Hexane (1:2:1) cc     |
| 33    | 249     | C <sub>19</sub> H <sub>18</sub> ClN <sub>3</sub> O <sub>5</sub> S <sub>0.15H2O</sub> ; C, 58.49; H, 4.73; N, 10.77; S, 8.20; Found: C, 58.21; H, 4.79; N, 11.07; S, 8.20.     | 22        | <sup>1</sup> H NMR: 0.87 (t, 3H), 1.79 (m, 2H), 3.23 (s, 3H), 4.48 (t, 2H), 7.24 (dd, J=8.8 Hz, J=2.4 Hz, 1H), 7.54 (d, J=8.8 Hz, 1H), 7.75 (dd, J=8.4 Hz, J=1.6 Hz, 1H), 7.86 (d, J=8.4 Hz, 1H), 8.16 (s, 1H), 8.23 (d, J=1.6 Hz, 1H), 8.46 (d, J=1.6 Hz, 1H), 12.02 (brd s, 1H). <sup>13</sup> C NMR: 10.91, 22.34, 44.19, 45.51, 104.06, 110.74, 113.51, 117.75, 120.00, 120.76, 122.59, 125.25, 127.63, 128.23, 134.13, 134.56, 138.76, 142.35, 151.55.                                                                             | 388           | CHCl <sub>3</sub> ; EtOAc; n-Hexane (1:2:1) cc     |
| 34    | 195     | C <sub>19</sub> H <sub>18</sub> ClN <sub>3</sub> O <sub>5</sub> S <sub>0.15H2O</sub> ; C, 64.89; H, 5.80; N, 11.35; S, 8.64; Found: C, 64.67; H, 5.86; N, 11.45; S, 8.61.     | 55        | <sup>1</sup> H NMR: 0.88 (t, 3H), 1.31 (m, 2H), 1.75 (m, 2H), 3.25 (s, 3H), 4.53 (t, 2H), 7.18-7.28 (m, 2H), 7.54 (d, J=8.0 Hz, 1H), 7.77 (dd, J=8.4 Hz, J=1.6 Hz, 1H), 7.86 (d, J=8.4 Hz, 1H), 8.08 (d, J=2.8 Hz, 1H), 8.20 (d, J=1.6 Hz, 1H), 8.37 (d, J=8.0 Hz, 1H), 11.86 (brd s, 1H). <sup>13</sup> C NMR: 13.49, 19.36, 31.08, 43.95, 44.26, 104.27, 110.69, 111.87, 117.61, 119.95, 120.49, 121.42, 122.50, 126.45, 126.76, 133.99, 136.05, 138.72, 142.52, 152.19.                                                              | 368           | CHCl <sub>3</sub> ; EtOAc; n-Hexane (1:2:1) cc     |
| 35    | 215     | C <sub>21</sub> H <sub>23</sub> N <sub>3</sub> O <sub>5</sub> S <sub>0.35H2O</sub> ; C, 62.46; H, 5.92; N, 10.41; S, 7.92; Found: C, 62.16; H, 5.87; N, 10.48; S, 8.29.       | 25        | <sup>1</sup> H NMR: 0.85 (t, 3H), 1.32 (m, 2H), 1.76 (m, 2H), 3.25 (s, 3H), 3.82 (s, 3H), 4.52 (t, 2H), 6.91 (dd, J=8.8 Hz, J=2.4 Hz, 1H), 7.44 (d, J=8.8 Hz, 1H), 7.77 (dd, J=8.4 Hz, J=1.6 Hz, 1H), 7.86 (d, J=8.4 Hz, 1H), 7.86 (d, J=8.4 Hz, 1H), 7.91 (d, J=2.4 Hz, 1H), 8.04 (d, J=3.2 Hz, 1H), 8.20 (d, J=2.0 Hz, 1H), 11.74 (brd s, 1H). <sup>13</sup> C NMR: 13.50, 19.38, 31.06, 44.00, 44.26, 55.35, 103.09, 103.79, 110.71, 112.61, 112.71, 117.48, 119.99, 127.04, 127.23, 131.07, 134.05, 138.61, 142.15, 152.27, 154.54. | 398           | CHCl <sub>3</sub> ; EtOAc; n-Hexane (1:2:1) cc     |
| 36    | 129     | C <sub>20</sub> H <sub>20</sub> ClN <sub>3</sub> O <sub>5</sub> S <sub>0.20H2O</sub> ; C, 57.26; H, 5.29; N, 10.02; S, 7.62; Found: C, 57.00; H, 5.37; N, 9.89; S, 7.26.      | 28        | <sup>1</sup> H NMR: 0.87 (t, 3H), 1.33 (m, 2H), 1.76 (m, 2H), 3.26 (s, 3H), 4.54 (t, 2H), 7.27 (d, J=7.2 Hz, 1H), 7.57 (d, J=8.4 Hz, 1H), 7.78 (d, J=8.0 Hz, 1H), 7.87 (d, J=8.8 Hz, 1H), 8.19 (s, 1H), 8.25 (s, 1H), 8.47 (s, 1H), 12.06 (brd s, 1H). <sup>13</sup> C NMR: 13.46, 19.31, 31.02, 43.88, 44.12, 103.99, 110.64, 113.46, 117.70, 119.96, 120.67, 122.54, 125.20, 127.55, 128.18, 134.07, 134.49, 138.61, 142.30, 151.46.                                                                                                  | 402           | CHCl <sub>3</sub> ; EtOAc; n-Hexane (1:2:1) cc     |
| 37    | 129     | C <sub>20</sub> H <sub>20</sub> ClN <sub>3</sub> O <sub>5</sub> S <sub>0.20H2O</sub> ; C, 57.26; H, 5.29; N, 10.02; S, 7.62; Found: C, 57.00; H, 5.37; N, 9.89; S, 7.26.      | 27        | <sup>1</sup> H NMR: 0.87 (t, 3H), 1.33 (m, 2H), 1.76 (m, 2H), 3.26 (s, 3H), 4.54 (t, 2H), 7.27 (d, J=7.2 Hz, 1H), 7.57 (d, J=8.4 Hz, 1H), 7.78 (d, J=8.0 Hz, 1H), 7.87 (d, J=8.8 Hz, 1H), 8.19 (s, 1H), 8.25 (s, 1H), 8.47 (s, 1H), 12.06 (brd s, 1H). <sup>13</sup> C NMR: 13.46, 19.31, 31.02, 43.88, 44.12, 103.99, 110.64, 113.46, 117.70, 119.96, 120.67, 122.54, 125.20, 127.55, 128.18, 134.07, 134.49, 138.61, 142.30, 151.46.                                                                                                  | 402           | CHCl <sub>3</sub> ; EtOAc; n-Hexane (1.5:2:1) cc   |
| 38    | 240     | C <sub>23</sub> H <sub>25</sub> N <sub>3</sub> O <sub>5</sub> S <sub>0.20H2O</sub> ; C, 65.64; H, 6.01; N, 10.43; S, 7.96; Found: C, 65.61; H, 6.45; N, 10.28; S, 7.74.       | 42        | <sup>1</sup> H NMR: 1.36 (m, 3H), 1.64 (d, 1H), 1.90 (m, 4H), 2.32 (m, 2H), 3.20 (s, 3H), 4.63 (m, 1H), 7.13-7.25 (m, 2H), 7.53 (d, J=8.0 Hz, 1H), 7.71 (dd, J=8.4 Hz, J=1.6 Hz, 1H), 7.83 (d, J=2.8 Hz, 1H), 7.95 (d, J=8.0 Hz, 1H), 8.08 (d, J=8.4 Hz, 1H), 8.18 (d, J=1.6 Hz, 1H), 11.80 (brd s, 1H, NH). <sup>13</sup> C NMR: 18.46, 24.30, 25.48, 30.45, 44.19, 55.93, 56.55, 104.14, 111.97, 113.17, 118.06, 119.51, 120.15, 120.32, 122.30, 126.45, 127.14, 133.73, 136.04, 136.71, 143.34, 152.18.                              | 394           | CHCl <sub>3</sub> ; EtOAc; n-Hexane (1:1.5:0.5) cc |
| 39    | 210     | C <sub>23</sub> H <sub>25</sub> N <sub>3</sub> O <sub>5</sub> S <sub>0.35H2O</sub> ; C, 63.86; H, 6.05; N, 9.71; S, 7.41; Found: C, 63.47; H, 6.29; N, 9.34; S, 7.05.         | 37        | <sup>1</sup> H NMR: 1.340 (m, 3H), 1.68 (d, 1H), 1.93 (m, 4H), 2.34 (m, 2H), 3.24 (s, 3H), 3.78 (s, 3H), 4.64 (m, 1H), 6.90 (dd, J=8.8 Hz, J=2.8 Hz, 1H), 7.44 (m, 2H), 7.73 (dd, J=8.4 Hz, J=1.6 Hz, 1H), 7.80 (d, J=2.8 Hz, 1H), 8.10 (d, J=8.4 Hz, 1H), 8.20 (d, J=2.0 Hz, 1H), 11.70 (brd d, 1H). <sup>13</sup> C NMR: 14.05, 24.38, 25.57, 30.55, 44.26, 55.25, 56.63, 59.72, 101.52, 104.02, 112.75, 112.82, 113.20, 118.11, 119.53, 126.98, 127.61, 131.11, 133.76, 136.80, 143.43, 152.44, 154.44.                              | 424           | CHCl <sub>3</sub> ; EtOAc; n-Hexane (1:1.5:0.5) cc |

|    |     |                                                                                                                               |    |                                                                                                                                                                                                                                                                                                                                                                                                                                                                                                                            |     |                                                    |
|----|-----|-------------------------------------------------------------------------------------------------------------------------------|----|----------------------------------------------------------------------------------------------------------------------------------------------------------------------------------------------------------------------------------------------------------------------------------------------------------------------------------------------------------------------------------------------------------------------------------------------------------------------------------------------------------------------------|-----|----------------------------------------------------|
| 40 | 178 | $C_{22}H_{22}ClN_2O_5S_{1.9}H_{20}O^+$ : C, 59.55; H, 5.41; N, 9.47; S, 7.21;<br>Found: C, 59.36; H, 5.55; N, 9.68; S, 7.10.  | 43 | $^1H$ NMR: 1.43 (m, 3H), 1.68 (s, 1H), 1.87-1.98 (m, 4H), 2.33 (m, 2H), 3.35 (s, 3H), 4.67 (m, 1H), 7.27 (dd, $J=8.4$ Hz, $J=2.0$ Hz, 1H), 7.58 (d, $J=9.2$ Hz, 1H), 7.74 (dd, $J=8.4$ Hz, $J=1.6$ Hz, 1H), 7.96 (d, $J=2.8$ Hz, 1H), 8.07 (d, $J=1.6$ Hz, 1H), 8.11 (d, $J=8.4$ Hz, 1H), 8.25 (d, $J=1.6$ Hz, 1H), 12.02 (brd s, 1H, NH). $^{13}C$ NMR: 24.38, 25.49, 30.48, 44.20, 48.57, 56.66, 103.98, 113.30, 113.65, 118.24, 119.64, 119.76, 122.48, 125.15, 127.75, 128.61, 133.94, 134.65, 136.72, 143.31, 151.53. | 428 | CHCl <sub>3</sub> ; EtOAc: n-Hexane (1:1.5:0.5) cc |
| 41 | 230 | $C_{22}H_{22}BrN_2O_5S$ : C, 55.94; H, 4.69; N, 8.90; S, 6.79;<br>Found: C, 55.40; H, 4.65; N, 9.30; S, 6.67.                 | 69 | $^1H$ NMR: 1.40 (m, 3H), 1.65 (s, 1H), 1.84-1.95 (m, 4H), 2.31 (m, 2H), 3.22 (s, 3H), 4.64 (m, 1H), 7.35 (dd, $J=8.4$ Hz, $J=2$ Hz, 1H), 7.51 (d, $J=8.8$ Hz, 1H), 7.71 (dd, $J=8.4$ Hz, $J=2.0$ Hz, 1H), 7.92 (s, 1H), 8.08 (d, $J=8.4$ Hz, 1H), 8.21 (dd, $J=11$ Hz, $J=2$ Hz, 2H), 12.0 (brd s, 1H). $^{13}C$ NMR: 24.31, 25.42, 30.42, 44.13, 56.59, 103.80, 113.04, 113.23, 114.01, 118.19, 119.56, 122.73, 124.93, 128.32, 128.37, 133.87, 134.82, 136.66, 143.26, 151.44.                                           | 474 | CHCl <sub>3</sub> ; EtOAc: n-Hexane (1:1.5:0.5) cc |
| 42 | 252 | $C_{23}H_{23}N_3O_5S_{1.0}H_{20}O^+$ : C, 67.89; H, 4.85; N, 10.33; S, 7.86;<br>Found: C, 67.49; H, 4.83; N, 10.50; S, 7.84.  | 13 | $^1H$ NMR: 3.26 (s, 3H), 5.86 (s, 2H), 7.08 (d, $J=7.2$ Hz, 2H), 7.19-7.34 (m, 5H), 7.50 (dd, $J=7.0$ Hz, $J=1.6$ Hz, 1H), 7.75-7.79 (m, 3H), 8.26 (s, 1H), 8.45 (dd, $J=7.2$ Hz, $J=1.6$ Hz, 1H), 11.79 (brd s, 1H). $^{13}C$ NMR: 44.21, 47.37, 103.95, 110.75, 111.90, 117.73, 120.33, 120.66, 121.53, 122.66, 125.97, 126.36, 126.85, 127.50, 128.96, 134.42, 136.00, 136.61, 139.01, 142.66, 152.63.                                                                                                                  | 402 | CHCl <sub>3</sub> ; EtOAc: n-Hexane (1:1.5:0.5) cc |
| 43 | 309 | $C_{23}H_{23}N_3O_5S_{1.0}H_{20}O^+$ : C, 63.43; H, 4.86; N, 9.64; S, 7.36;<br>Found: C, 63.69; H, 4.70; N, 9.44; S, 7.57.    | 44 | $^1H$ NMR: 3.25 (s, 3H), 3.79 (s, 3H), 5.81 (s, 2H), 6.87 (dd, $J=8.8$ Hz, $J=2.4$ Hz, 1H), 7.07 (d, $J=7.6$ Hz, 2H), 7.23-7.39 (m, 4H), 7.68-7.73 (m, 3H), 7.94 (d, $J=2.4$ Hz, 1H), 8.25 (s, 1H), 11.61 (brd s, 1H). $^{13}C$ NMR: 44.22, 47.37, 55.31, 103.13, 103.71, 110.64, 112.60, 112.79, 117.72, 120.23, 125.96, 126.97, 127.20, 127.46, 128.93, 131.00, 134.34, 136.59, 138.98, 142.65, 152.81, 154.58.                                                                                                          | 432 | CHCl <sub>3</sub> ; EtOAc: n-Hexane (1:1.5:0.5) cc |
| 44 | 301 | $C_{23}H_{23}ClN_2O_5S$ : C, 63.36; H, 4.16; N, 9.63; S, 7.35;<br>Found: C, 62.78; H, 4.16; N, 9.48; S, 7.02.                 | 19 | $^1H$ NMR: 3.26 (s, 3H), 5.88 (s, 2H), 7.08 (d, $J=7.6$ Hz, 2H), 7.25-7.34 (m, 4H), 7.53 (d, $J=8.4$ Hz, 1H), 7.76 (s, 2H), 7.89 (s, 1H), 8.32 (s, 1H), 8.53 (d, $J=2.0$ Hz, 1H), 11.97 (brd s, 1H, NH). $^{13}C$ NMR: 44.07, 47.25, 103.68, 110.67, 113.47, 117.83, 120.33, 120.69, 122.65, 125.32, 125.87, 127.43, 128.21, 128.88, 134.42, 134.50, 136.39, 138.89, 142.44, 151.91.                                                                                                                                       | 436 | CHCl <sub>3</sub> ; EtOAc: n-Hexane (1:1.5:0.5) cc |
| 45 | 179 | $C_{23}H_{23}FNO_5S_{1.6}H_{20}O^+$ : C, 61.61; H, 4.76; N, 9.37; S, 7.13;<br>Found: C, 61.31; H, 4.24; N, 9.45; S, 7.10.     | 47 | $^1H$ NMR: 3.25 (s, 3H), 5.84 (s, 2H), 7.10-7.27 (m, 6H), 7.51 (dd, $J=7.2$ Hz, $J=1.2$ Hz, 1H), 7.75 (d, $J=1.2$ Hz, 2H), 7.82 (d, $J=2.8$ Hz, 1H), 8.25 (t, 1H), 8.42 (d, $J=8.4$ Hz, 1H), 11.79 (brd s, 1H). $^{13}C$ NMR: 44.19, 46.73, 103.88, 110.72, 111.89, 115.76 (d, $J=21.3$ Hz), 117.74, 120.35, 120.64, 121.49, 122.65, 126.33, 126.85, 128.08 (d, $J=8.4$ Hz), 132.73 (d, $J=3.1$ Hz), 134.48, 136.00, 138.86, 142.66, 152.53, 161.38 (d, $J=24.1$ Hz).                                                      | 420 | CHCl <sub>3</sub> ; EtOAc: n-Hexane (1:1:1) cc     |
| 46 | 273 | $C_{23}H_{23}ClFN_2O_5S$ : C, 60.86; H, 3.78; N, 9.26; S, 7.06;<br>Found: C, 60.46; H, 3.75; N, 9.30; S, 6.96.                | 59 | $^1H$ NMR: 3.25 (s, 3H), 5.85 (s, 2H), 7.09-7.17 (m, 4H), 7.25 (dd, $J=8.8$ Hz, $J=2.0$ Hz, 1H), 7.52 (d, $J=8.4$ Hz, 1H), 7.76 (s, 2H), 7.91 (s, 1H), 8.30 (s, 1H), 8.50 (d, $J=2.4$ Hz, 1H). $^{13}C$ NMR: 44.14, 46.70, 103.70, 110.74, 113.56, 115.78 (d, $J=21.3$ Hz), 117.93, 120.45, 120.75, 122.74, 125.41, 127.49, 128.77 (d, $J=7.6$ Hz), 128.32, 132.59 (d, $J=3.1$ Hz), 134.52, 134.63, 138.84, 142.54, 151.90, 161.40 (d, $J=24.2$ Hz).                                                                       | 454 | CHCl <sub>3</sub> ; EtOAc: n-Hexane (1:1:1) cc     |
| 47 | 183 | $C_{23}H_{23}BrFN_2O_5S_{1.0}H_{20}O^+$ : C, 53.49; H, 3.70; N, 8.13; S, 6.21; Found: C, 53.11; H, 3.54; N, 8.13; S, 6.84.    | 54 | $^1H$ NMR: 3.24 (s, 3H), 5.84 (s, 2H), 7.08-7.16 (m, 4H), 7.36 (dd, $J=8.8$ Hz, $J=1.6$ Hz, 1H), 7.47 (d, $J=8.4$ Hz, 1H), 7.76 (s, 2H), 7.91 (d, $J=2.8$ Hz, 1H), 8.29 (s, 1H), 8.60 (d, $J=1.6$ Hz, 1H), 12.01 (brd s, 1H). $^{13}C$ NMR: 44.10, 46.79, 103.12, 110.96, 113.50, 114.07, 115.79 (d, $J=21.4$ Hz), 117.69, 120.68, 123.65, 125.34, 128.05 (d, $J=7.6$ Hz), 128.16, 128.48, 132.45 (d, $J=3.1$ Hz), 134.78, 134.88, 138.62, 141.79, 151.70, 161.42 (d, $J=24.2$ Hz).                                        | 500 | CHCl <sub>3</sub> ; EtOAc: n-Hexane (1:1.5:0.5) cc |
| 48 | 193 | $C_{24}H_{24}F_2N_2O_5S$ : C, 61.66; H, 4.10; N, 8.99; S, 7.33;<br>Found: C, 62.89; H, 3.72; N, 9.82; S, 7.30.                | 68 | $^1H$ NMR: 6 ppm 3.23 (s, 3H), 5.82 (s, 2H), 6.76 (m, 1H), 7.17-7.37 (m, 4H), 7.48 (m, 1H), 7.49-7.81 (m, 3H), 8.23 (t, 1H), 8.41 (dd, $J=7.2$ Hz, $J=1.6$ Hz, 1H), 11.78 (s, 1H).                                                                                                                                                                                                                                                                                                                                         | 438 | CHCl <sub>3</sub> ; EtOAc: n-Hexane (1:1.5:0.5) cc |
| 49 | 281 | $C_{24}H_{24}FN_2O_5S$ : C, 61.66; H, 4.10; N, 8.99; S, 6.86;<br>Found: C, 61.34; H, 3.97; N, 9.08; S, 6.86.                  | 49 | $^1H$ NMR: 3.23 (s, 3H), 3.79 (s, 3H), 5.80 (s, 2H), 6.75 (m, 1H), 6.87 (dd, $J=9.2$ Hz, $J=2.4$ Hz, 1H), 7.23-7.39 (m, 3H), 7.73-7.76 (m, 3H), 7.93 (d, $J=2.4$ Hz, 1H), 8.24 (d, $J=1.2$ Hz, 1H), 11.65 (brd s, 1H).                                                                                                                                                                                                                                                                                                     | 468 | CHCl <sub>3</sub> ; EtOAc: n-Hexane (1:1.5:0.5) cc |
| 50 | 292 | $C_{23}H_{23}ClFN_2O_5S$ : C, 58.54; H, 3.42; N, 8.90; S, 6.79;<br>Found: C, 58.26; H, 3.21; N, 9.06; S, 6.80.                | 50 | $^1H$ NMR: 3.26 (s, 3H), 5.86 (s, 2H), 6.76 (m, 1H), 7.25-7.39 (m, 3H), 7.53 (d, $J=8.8$ Hz, 1H), 7.78 (s, 2H), 7.93 (s, 1H), 8.31 (s, 1H), 8.50 (d, $J=2.0$ Hz, 1H), 12.00 (brd s, 1H).                                                                                                                                                                                                                                                                                                                                   | 472 | CHCl <sub>3</sub> ; EtOAc: n-Hexane (1:1.5:0.5) cc |
| 51 | 285 | $C_{23}H_{23}BrFN_2O_5S$ : C, 53.50; H, 3.12; N, 8.14; S, 6.21;<br>Found: C, 53.11; H, 2.78; N, 8.42; S, 6.19.                | 65 | $^1H$ NMR: 3.26 (s, 3H), 5.86 (s, 2H), 6.76 (m, 1H), 7.27-7.39 (m, 3H), 7.49 (d, $J=8.4$ Hz, 1H), 7.78 (s, 2H), 7.91 (s, 1H), 8.32 (d, $J=1.2$ Hz, 1H), 8.64 (d, $J=1.6$ Hz, 1H), 12.00 (brd s, 1H).                                                                                                                                                                                                                                                                                                                       | 518 | CHCl <sub>3</sub> ; EtOAc: n-Hexane (1:1.5:0.5) cc |
| 52 | 148 | $C_{23}H_{23}ClN_2O_5S_{1.0}H_{20}O^+$ : C, 62.85; H, 4.21; N, 9.56; S, 7.29;<br>Found: C, 62.62; H, 4.51; N, 9.27; S, 6.95.  | 15 | $^1H$ NMR: 3.23 (s, 3H), 5.83 (s, 2H), 7.07 (d, $J=8.8$ Hz, 2H), 7.17-7.25 (m, 2H), 7.36 (m, 2H), 7.48 (dd, $J=7.2$ Hz, $J=1.2$ Hz, 1H), 7.73 (d, $J=1.2$ Hz, 2H), 7.77 (s, 1H), 8.23 (d, 1H), 8.42 (m, 1H), 11.76 (brd s, 1H). $^{13}C$ NMR: 44.18, 46.78, 103.83, 110.67, 111.89, 117.74, 120.37, 120.64, 121.51, 122.65, 126.32, 126.84, 127.90, 128.90, 132.07, 134.51, 135.62, 135.99, 138.86, 142.66, 152.52.                                                                                                        | 436 | CHCl <sub>3</sub> ; EtOAc: n-Hexane (1:1.5:0.5) cc |
| 53 | 236 | $C_{24}H_{24}ClN_2O_5S_{1.0}H_{20}O^+$ : C, 61.62; H, 4.35; N, 8.98; S, 6.85;<br>Found: C, 61.34; H, 4.64; N, 8.89; S, 6.62.  | 19 | $^1H$ NMR: 3.23 (s, 3H), 3.79 (s, 3H), 5.82 (s, 2H), 6.87 (dd, $J=9.0$ Hz, $J=2.4$ Hz, 1H), 7.89 (d, $J=8.4$ Hz, 2H), 7.37 (d, $J=8.8$ Hz, 3H), 7.71-7.72 (m, 3H), 7.94 (d, $J=2.4$ Hz, 1H), 8.23 (s, 1H), 11.64 (brd s, 1H). $^{13}C$ NMR: 44.20, 46.79, 55.31, 103.15, 103.59, 110.59, 112.61, 112.81, 117.75, 120.31, 126.96, 127.20, 127.91, 128.90, 131.00, 132.07, 134.45, 135.63, 138.86, 142.66, 152.72, 154.60.                                                                                                   | 466 | CHCl <sub>3</sub> ; isopropanol (10:0.5) cc        |
| 54 | 233 | $C_{23}H_{23}Cl_2N_2O_5S_{1.1}H_{20}O^+$ : C, 56.14; H, 3.97; N, 8.54; S, 6.51; Found: C, 55.82; H, 3.30; N, 8.89; S, 6.54.   | 24 | $^1H$ NMR: 3.24 (s, 3H), 5.85 (s, 2H), 7.07 (d, $J=8.8$ Hz, 2H), 7.24 (dd, $J=9.0$ Hz, $J=2.0$ Hz, 1H), 7.37 (dd, $J=6.8$ Hz, $J=2.0$ Hz), 7.51 (d, $J=8.4$ Hz, 1H), 7.75 (d, $J=0.8$ Hz, 2H), 7.88 (s, 1H), 8.29 (s, 1H), 8.50 (d, $J=2.0$ Hz, 1H), 11.95 (brd s, 1H). $^{13}C$ NMR: 44.04, 46.65, 103.56, 110.62, 113.49, 117.86, 120.39, 120.70, 122.67, 125.33, 127.40, 127.82, 128.24, 128.84, 132.01, 134.42, 134.59, 135.42, 138.77, 142.44, 151.82.                                                                | 470 | CHCl <sub>3</sub> ; isopropanol (10:0.5) cc        |
| 55 | 239 | $C_{23}H_{23}BrClN_2O_5S_{1.1}H_2O$ : C, 51.32; H, 3.67; N, 7.80; S, 5.95; Found: C, 50.98; H, 3.19; N, 7.90; S, 5.85.        | 14 | $^1H$ NMR: 3.26 (s, 3H), 5.87 (s, 2H), 7.09 (d, $J=8.4$ Hz, 2H), 7.38 (m, 3H), 7.49 (d, $J=8.4$ Hz, 1H), 7.72 (d, $J=0.8$ Hz, 2H), 7.89 (s, 1H), 8.32 (s, 1H), 8.66 (d, $J=2.0$ Hz, 1H), 11.98 (brd s, 1H). $^{13}C$ NMR: 44.04, 46.65, 103.45, 110.62, 113.34, 113.92, 117.87, 120.39, 123.71, 125.20, 127.81, 128.02, 128.07, 128.84, 132.02, 134.60, 134.66, 135.41, 138.76, 142.43, 151.78.                                                                                                                            | 516 | CHCl <sub>3</sub> ; EtOAc: n-Hexane (1:1.5:0.5) cc |
| 56 | 260 | $C_{23}H_{23}Cl_2N_2O_5S_{1.1}H_{20}O^+$ : C, 56.35; H, 3.94; N, 8.57; S, 6.54; Found: C, 56.01; H, 3.69; N, 8.58; S, 6.43.   | 27 | $^1H$ NMR: 3.26 (s, 3H), 5.88 (s, 2H), 6.90 (dd, $J=8.4$ Hz, $J=2.4$ Hz, 1H), 7.20-7.28 (m, 2H), 7.48-7.56 (m, 3H), 7.77 (d, $J=1.2$ Hz, 2H), 7.83 (d, $J=3.2$ Hz, 1H), 8.27 (d, $J=0.8$ Hz, 1H), 8.45 (d, $J=7.2$ Hz, 1H), 11.80 (brd s, 1H). $^{13}C$ NMR: 44.10, 46.26, 103.62, 110.56, 111.84, 117.72, 120.42, 120.62, 121.42, 122.62, 126.01, 126.24, 126.82, 128.34, 130.06, 131.08, 131.39, 134.58, 135.93, 137.74, 138.70, 142.58, 152.40.                                                                         | 470 | CHCl <sub>3</sub> ; isopropanol (10:0.5) cc        |
| 57 | 296 | $C_{23}H_{23}Cl_2N_2O_5S_{1.2}H_{20}O^+$ : C, 53.57; H, 3.36; N, 8.14; S, 6.21; Found: C, 53.26; H, 3.16; N, 8.20; S, 6.13.   | 17 | $^1H$ NMR: 3.27 (s, 3H), 5.89 (s, 2H), 6.88 (dd, $J=8.8$ Hz, $J=2.0$ Hz, 1H), 7.27 (dd, $J=8.4$ Hz, $J=2.4$ Hz, 1H), 7.50-7.56 (m, 3H), 7.79 (d, $J=0.8$ Hz, 2H), 7.93 (s, 1H), 8.30 (s, 1H), 8.51 (d, $J=2.0$ Hz, 1H), 11.99 (brd s, 1H). $^{13}C$ NMR: 44.09, 46.29, 103.50, 110.64, 113.57, 117.97, 120.57, 120.72, 122.76, 125.43, 126.02, 127.45, 128.34, 128.41, 130.14, 131.15, 131.46, 134.50, 134.78, 137.66, 138.74, 142.50, 151.84.                                                                             | 504 | CHCl <sub>3</sub> ; isopropanol (10:0.5) cc        |
| 58 | 309 | $C_{23}H_{23}BrCl_2N_2O_5S_{1.0}H_{20}O^+$ : C, 48.69; H, 3.19; N, 7.40; S, 5.65; Found: C, 48.35; H, 2.97; N, 7.48; S, 5.59. | 29 | $^1H$ NMR: 3.24 (s, 3H), 5.86 (s, 2H), 6.85 (dd, $J=8.2$ Hz, $J=1.6$ Hz, 1H), 7.35 (dd, $J=8.8$ Hz, $J=1.6$ Hz, 1H), 7.46 (s, 1H), 7.47 (d, $J=2.0$ Hz, 1H), 7.53 (d, $J=8.8$ Hz, 1H), 7.76 (d, $J=1.2$ Hz, 2H), 7.88 (s, 1H), 8.31 (s, 1H), 8.63 (d, $J=2.0$ Hz, 1H), 11.97 (brd s, 1H). $^{13}C$ NMR: 44.02, 46.23, 103.32, 110.58, 113.38, 113.95, 117.93, 120.52, 123.68, 125.23, 125.96, 128.01, 128.13, 128.35, 130.08, 131.10, 131.41, 134.69, 134.74, 137.60, 138.68, 142.43, 151.75.                              | 550 | CHCl <sub>3</sub> ; isopropanol (10:0.5) cc        |

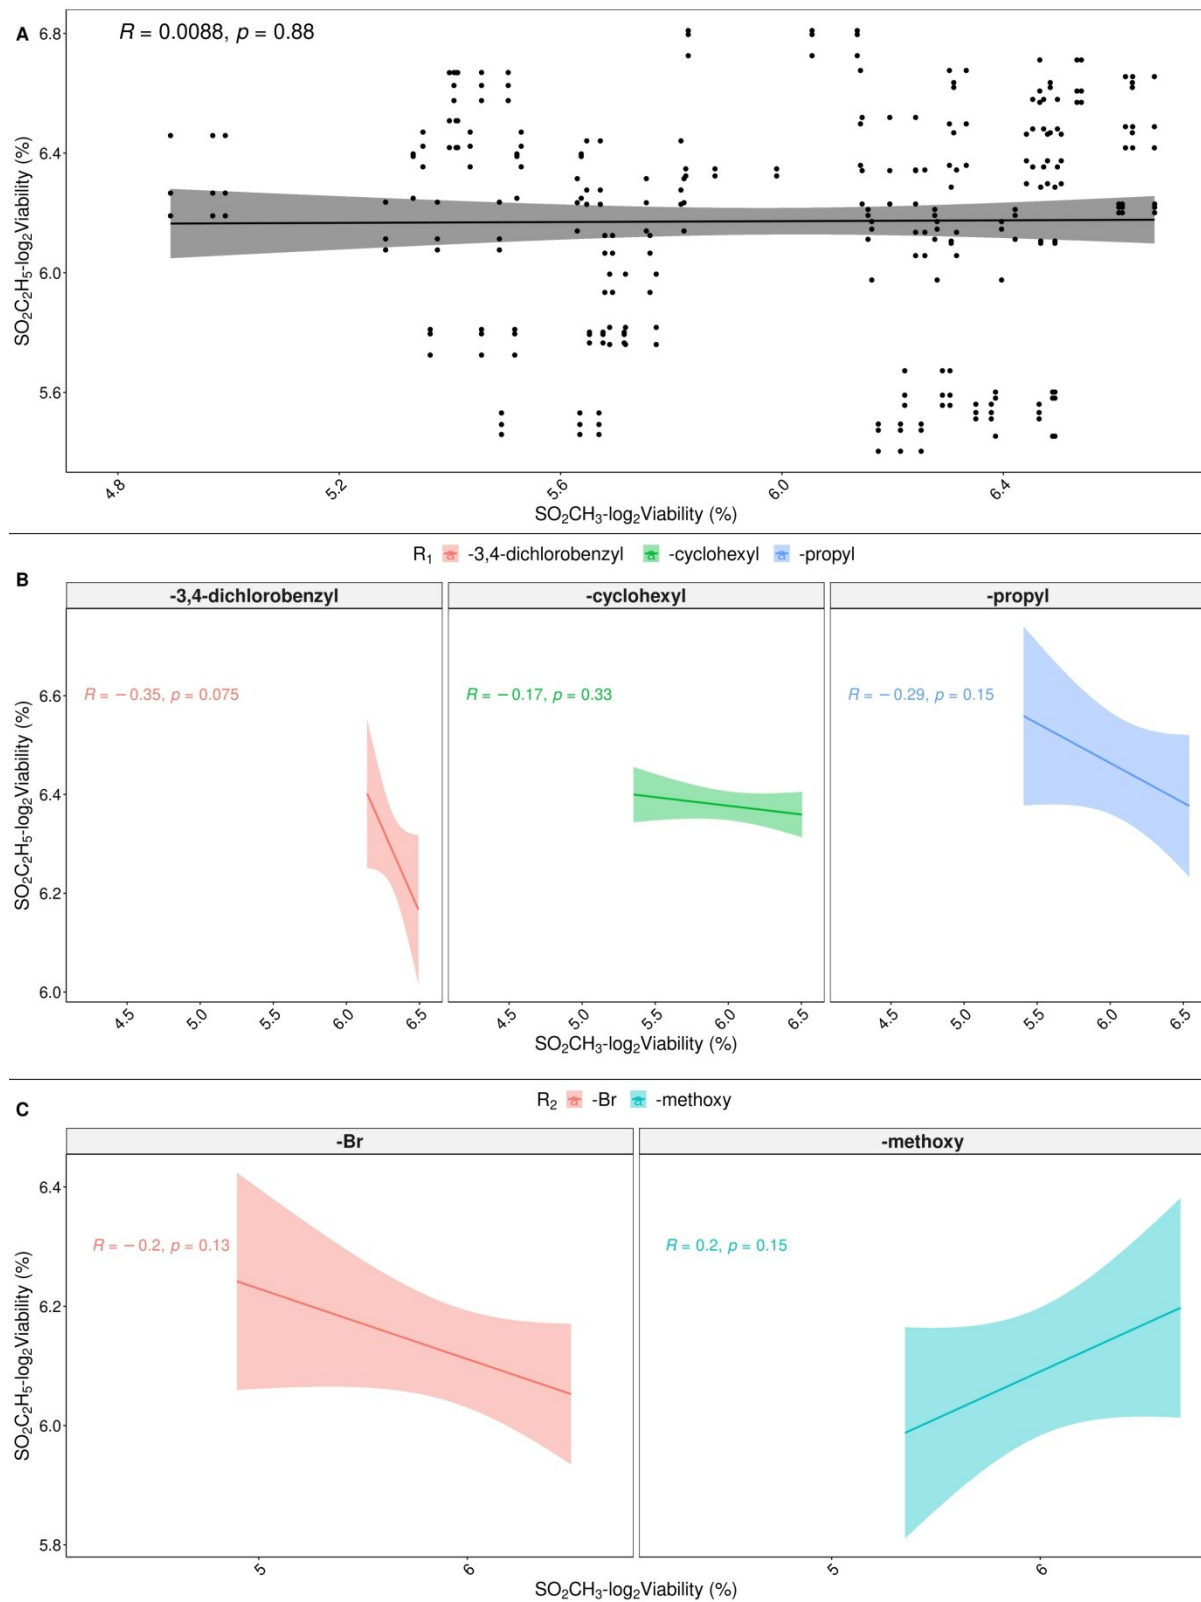

**Suppl. Figure 1.** Viability correlations between methylsulfonyl (20  $\mu\text{M}$ ) (x-axis) and ethylsulfonyl (16  $\mu\text{M}$ ) (y-axis) indole-benzimidazole exposures on MCF-7 for 24 hours. (A) Overall comparisons, (B) nonsignificant  $R_1$  and (C) nonsignificant  $R_2$  correlation assessments. Pearson's correlations were performed on the viability scores from the biological triplicates where the lines and shadow regions represent the linear correlations and confidence intervals, respectively.

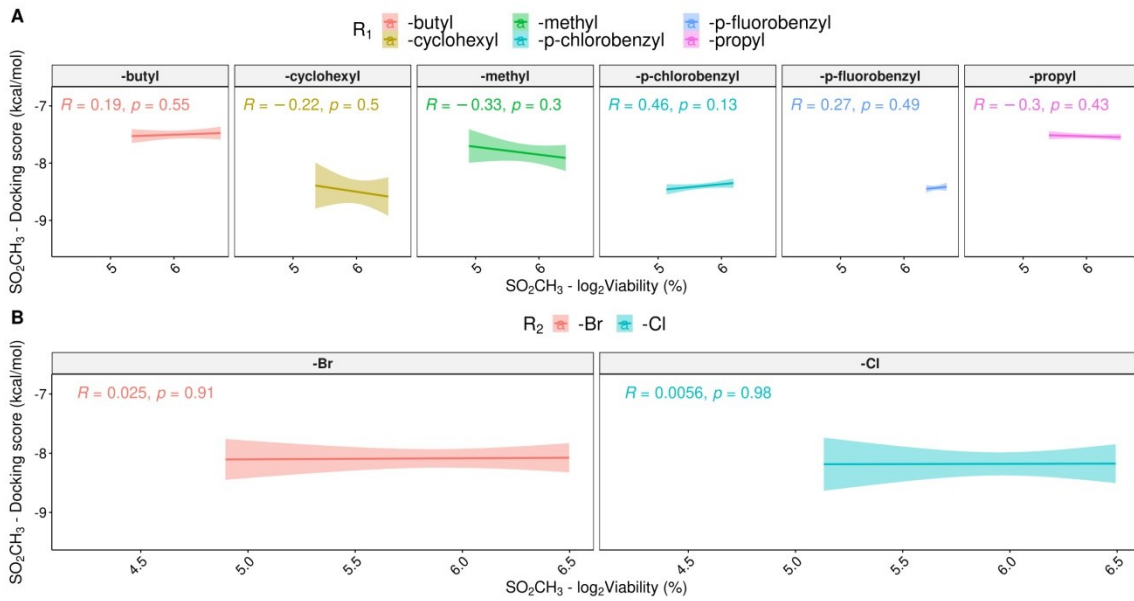

**Suppl. Figure 2.** Nonsignificant correlation maps between *in silico* docking scores (kcal/mol) (y-axes) and *in vitro* log<sub>2</sub> transformed viability percentiles (x-axes) obtained from methylsulfonyl derivative exposures on MCF-7 cell line in triplicates: (A)  $R_1$  and (B)  $R_2$ . Each  $R_1$  and  $R_2$  groups are color coded along with the confidence intervals, as Pearson's correlation and significance scores are depicted inside the plots with the respective color codes for each group.

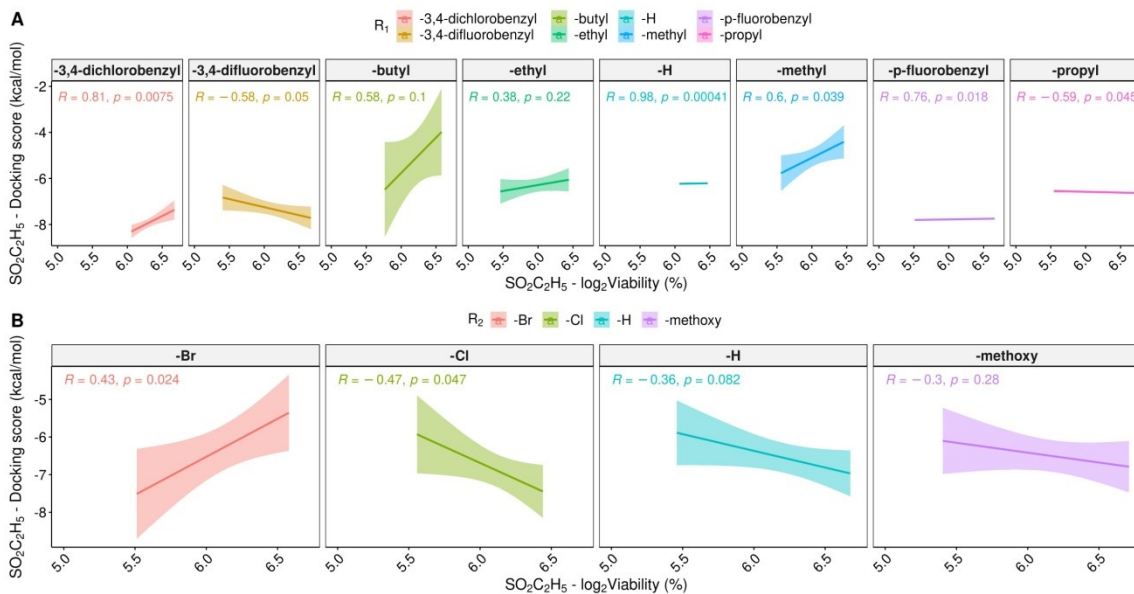

**Suppl. Figure 3.** Correlation maps between *in silico* docking scores (kcal/mol) (y-axes) and *in vitro* log<sub>2</sub> transformed viability percentiles (x-axes) obtained from ethylsulfonyl derivative exposures on MCF-7 cell line in triplicates: (A)  $R_1$  and (B)  $R_2$ . Each  $R_1$  and  $R_2$  groups are color coded along with the confidence intervals, as Pearson's correlation and significance scores are depicted inside the plots with the respective color codes for each group.



FI-102

Sample Name:  
FI-102  
Data Collected on:  
mercury400-mercury400  
Archive directory:  
/home/vnmr1/vnmrns/data  
Sample directory:  
FI-102\_20150429\_01  
Fidfile: PROTON\_02  
Pulse Sequence: PROTON (s2pul)  
Solvent: dmsc  
Data collected on: Apr 29 2015

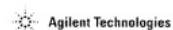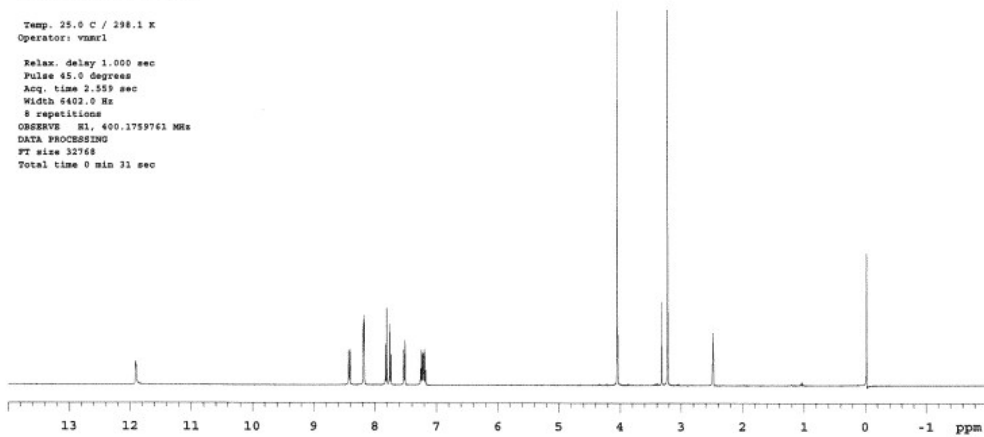

Suppl. Figure 4. <sup>1</sup>H NMR spectrum of compound 23.

FI-103

Sample Name:  
FI-103  
Data Collected on:  
mercury400-mercury400  
Archive directory:  
/home/vnmr1/vnmrns/data  
Sample directory:  
FI-103\_20150506\_01  
Fidfile: PROTON\_02  
Pulse Sequence: PROTON (s2pul)  
Solvent: dmsc  
Data collected on: May 6 2015

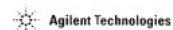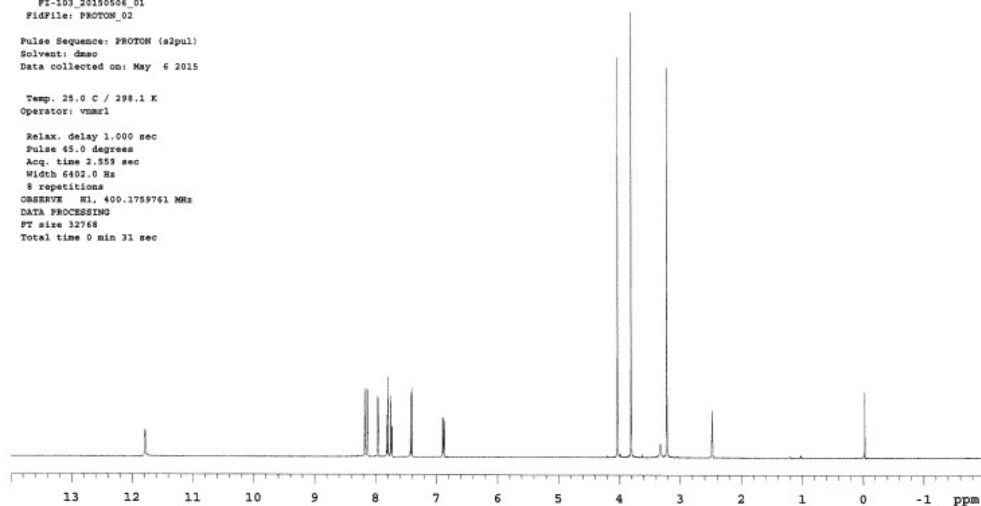

Suppl. Figure 5. <sup>1</sup>H NMR spectrum of compound 24.

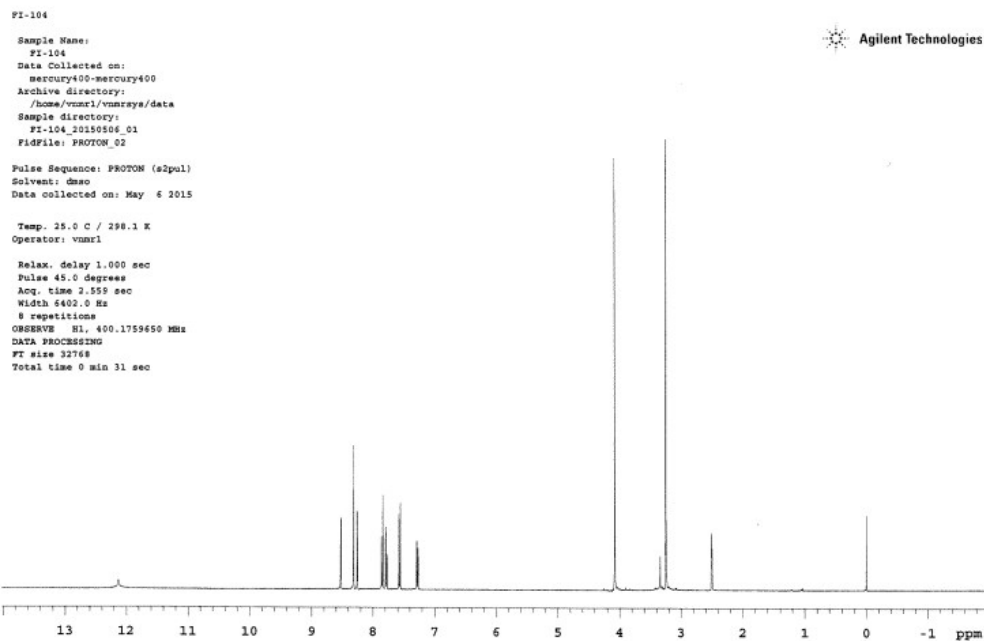

Suppl. Figure 6.  $^1\text{H}$  NMR spectrum of compound 25.

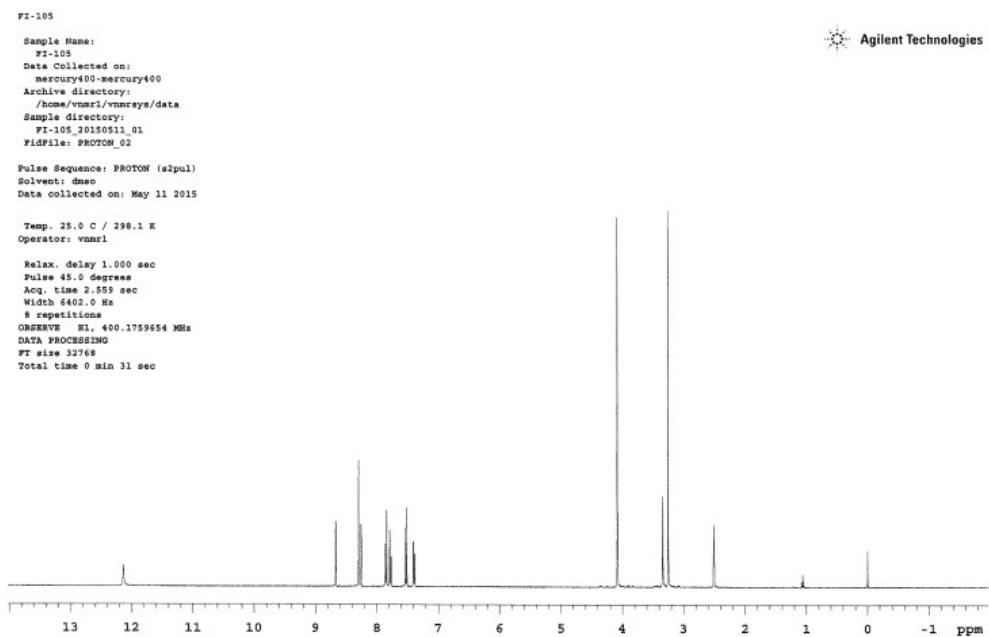

Suppl. Figure 7.  $^1\text{H}$  NMR spectrum of compound 26.

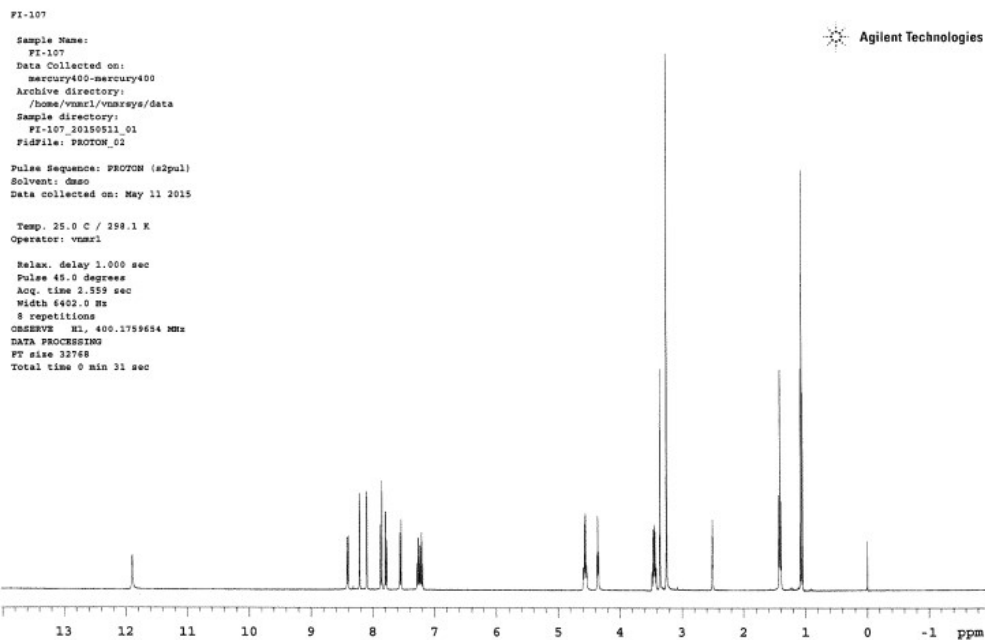

Suppl. Figure 8.  $^1\text{H}$  NMR spectrum of compound 27.

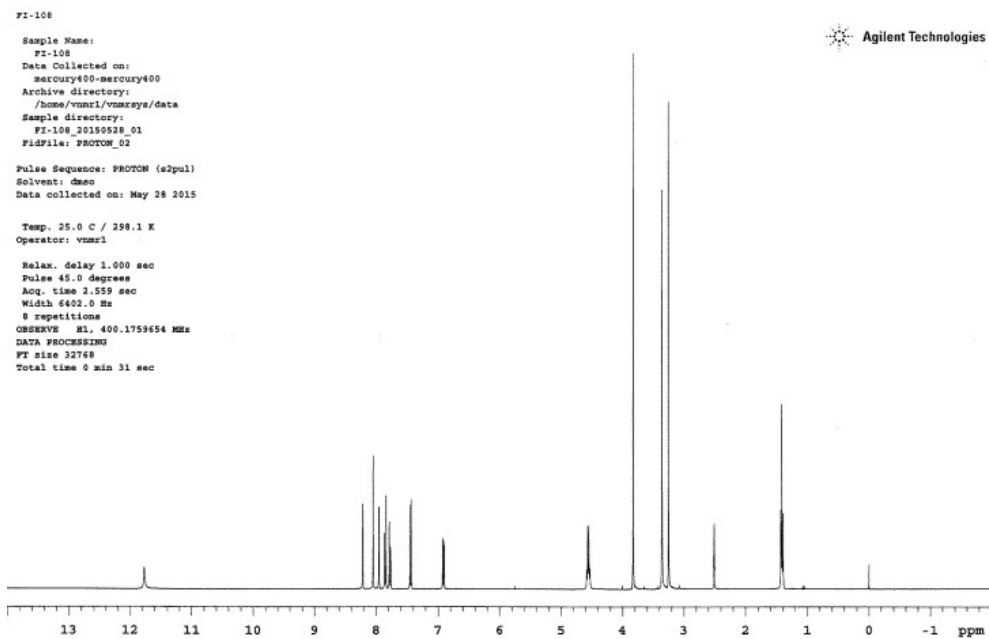

Suppl. Figure 9.  $^1\text{H}$  NMR spectrum of compound 28.

FI-109

Sample Name:  
FI-109  
Data Collected on:  
mercury400-mercury400  
Archive directory:  
/home/vnmr1/vnmrsys/data  
Sample directory:  
FI-109\_20150517\_01  
Fidfile: PROTON\_02  
Pulse Sequence: PROTON (s2pul)  
Solvent: dmsc  
Data collected on: May 17 2015

Temp. 25.0 C / 298.1 K  
Operator: vnmr1

Relax. delay 1.000 sec  
Pulse 45.0 degrees  
Acq. time 2.559 sec  
Width 4402.0 Hz  
8 repetitions  
OBSERVE H1, 400.1759643 MHz  
DATA PROCESSING  
F2 size 32768  
Total time 0 min 31 sec

Agilent Technologies

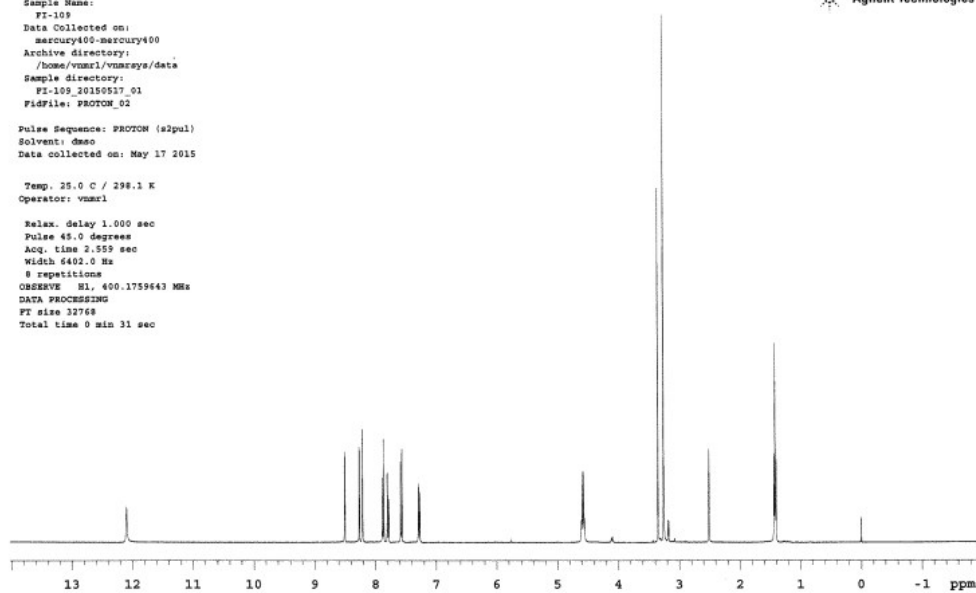

Suppl. Figure 10.  $^1\text{H}$  NMR spectrum of compound 29.

FI-110

Sample Name:  
FI-110  
Data Collected on:  
mercury400-mercury400  
Archive directory:  
/home/vnmr1/vnmrsys/data  
Sample directory:  
FI-110\_20150511\_01  
Fidfile: PROTON\_02  
Pulse Sequence: PROTON (s2pul)  
Solvent: dmsc  
Data collected on: May 11 2015

Temp. 25.0 C / 298.1 K  
Operator: vnmr1

Relax. delay 1.000 sec  
Pulse 45.0 degrees  
Acq. time 2.559 sec  
Width 4402.0 Hz  
8 repetitions  
OBSERVE H1, 400.1759646 MHz  
DATA PROCESSING  
F2 size 32768  
Total time 0 min 31 sec

Agilent Technologies

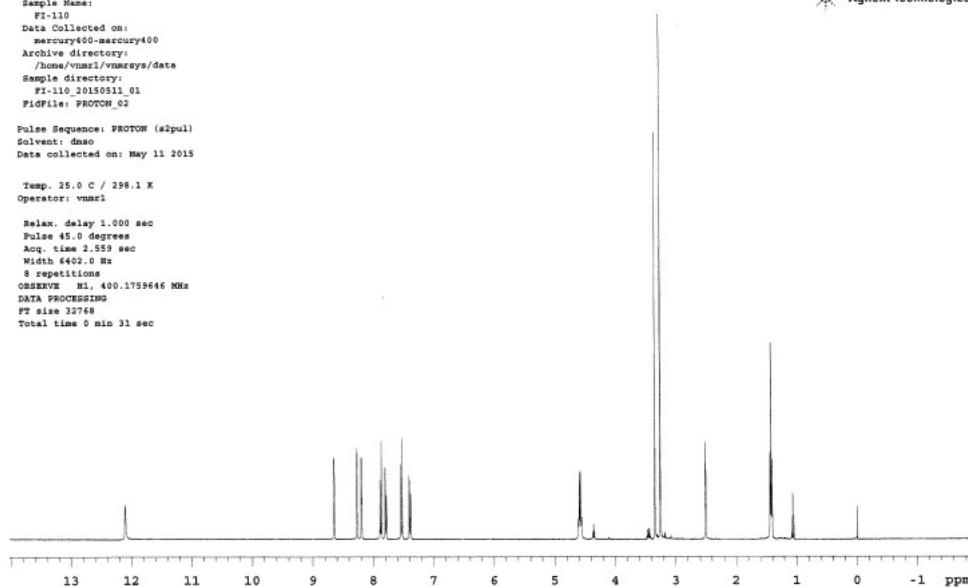

Suppl. Figure 11.  $^1\text{H}$  NMR spectrum of compound 30.

FI-113

Sample Name:  
FI-113  
Data Collected on:  
mercury400-mercury400  
Archive directory:  
/home/vnmr1/vnmrns/data  
Sample directory:  
FI-113\_20150506\_01  
Fidfile: PROTON\_02  
Pulse Sequence: PROTON (s2pul)  
Solvent: dmsc  
Data collected on: May 6 2015

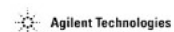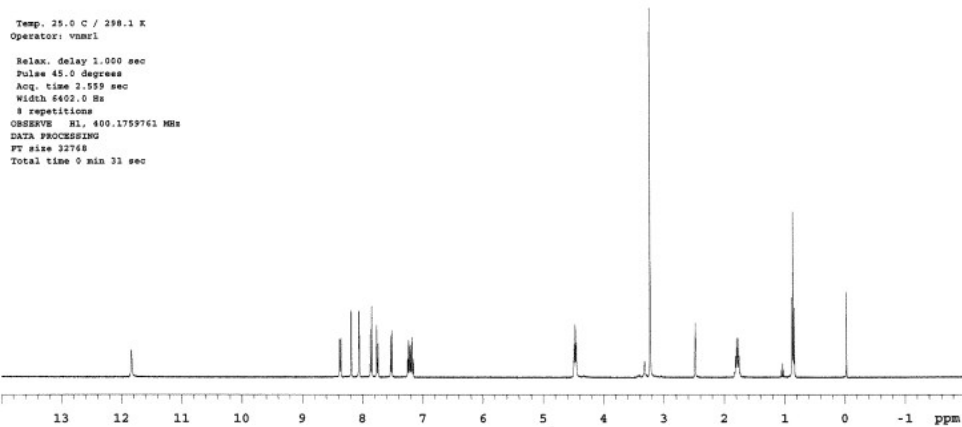

Suppl. Figure 12. <sup>1</sup>H NMR spectrum of compound 31.

FI-114

Sample Name:  
FI-114  
Data Collected on:  
mercury400-mercury400  
Archive directory:  
/home/vnmr1/vnmrns/data  
Sample directory:  
FI-114\_20150511\_01  
Fidfile: PROTON\_02  
Pulse Sequence: PROTON (s2pul)  
Solvent: dmsc  
Data collected on: May 11 2015  
Temp. 25.0 C / 298.1 K  
Operator: vnmr1  
Relax. delay 1.000 sec  
Pulse 45.0 degrees  
Acq. time 2.559 sec  
Width 6402.0 Hz  
8 repetitions  
OBSERVE H1, 400.1759761 MHz  
DATA PROCESSING  
FT size 33768  
Total time 0 min 31 sec

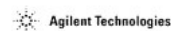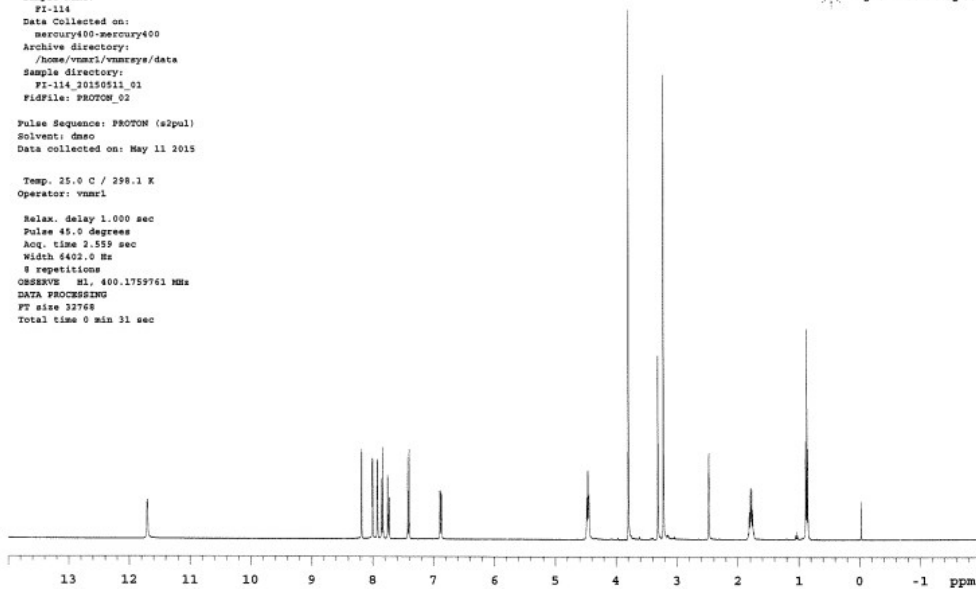

Suppl. Figure 13. <sup>1</sup>H NMR spectrum of compound 32.

FI-115

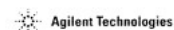

Sample Name:  
FI-115  
Data Collected on:  
mercury400-mercury400  
Archive directory:  
/home/vnmr1/vnmrsys/data  
Sample directory:  
FI-115\_20150518\_01  
Fidfile: PROTON\_02  
  
Pulse Sequence: PROTON (s2pul)  
Solvent: dms0  
Data collected on: May 18 2015  
  
Temp. 25.0 C / 298.1 K  
Operator: vnmr1  
  
Relax. delay 1.000 sec  
Pulse 45.0 degrees  
Acq. time 2.559 sec  
Width 6402.0 Hz  
8 repetitions  
OBSERVE H1, 400.1759761 MHz  
DATA PROCESSING  
F1 size 32768  
Total time 0 min 31 sec

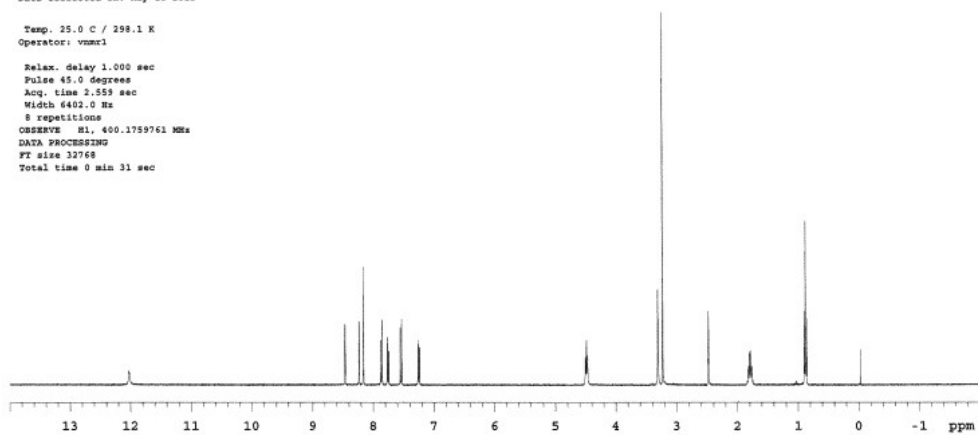

Suppl. Figure 14.  $^1\text{H}$  NMR spectrum of compound **33**.

FI-119

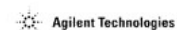

Sample Name:  
FI-119  
Data Collected on:  
mercury400-mercury400  
Archive directory:  
/home/vnmr1/vnmrsys/data  
Sample directory:  
FI-119\_20150520\_01  
Fidfile: PROTON\_02  
  
Pulse Sequence: PROTON (s2pul)  
Solvent: dms0  
Data collected on: May 20 2015  
  
Temp. 25.0 C / 298.1 K  
Operator: vnmr1  
  
Relax. delay 1.000 sec  
Pulse 45.0 degrees  
Acq. time 2.559 sec  
Width 6402.0 Hz  
8 repetitions  
OBSERVE H1, 400.1758650 MHz  
DATA PROCESSING  
F1 size 32768  
Total time 0 min 31 sec

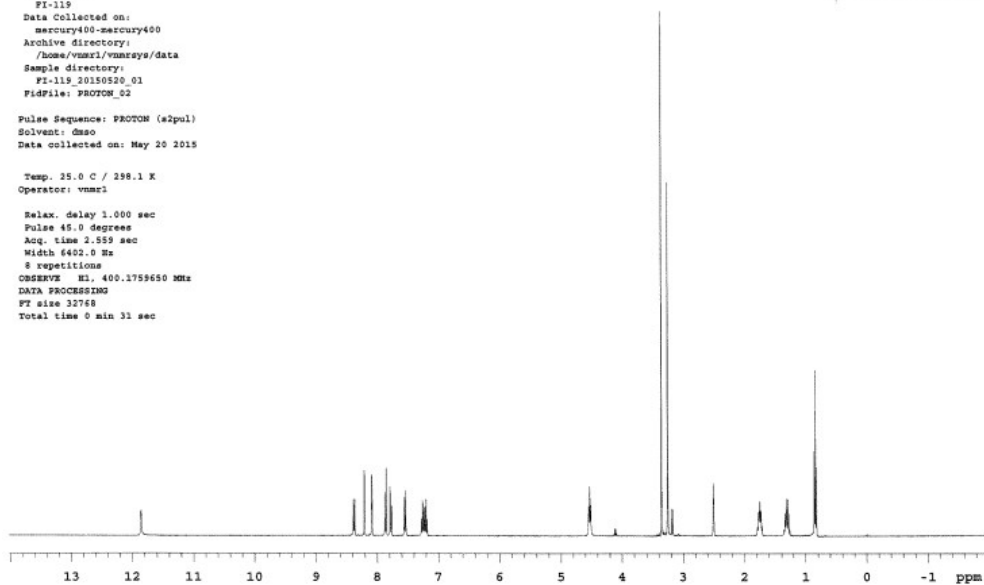

Suppl. Figure 15.  $^1\text{H}$  NMR spectrum of compound **34**.

PI-120

Sample Name:  
PI-111  
Data Collected on:  
mercury400-mercury400  
Archive directory:  
/home/vnmr1/vnmrnsya/data  
Sample directory:  
PI-111\_20150520\_01  
FidFile: PROTON\_02

Pulse Sequence: PROTON (s2pul)  
Solvent: dmsc  
Data collected on: May 20 2015

Temp. 25.0 C / 298.1 K  
Operator: vnmr1

Relax. delay 1.000 sec  
Pulse 45.0 degrees  
Acq. time 2.559 sec  
Width 6402.0 Hz  
8 repetitions  
OBSERVE F1, 400.1759662 MHz  
DATA PROCESSING  
FT size 32768  
Total time 0 min 31 sec

Agilent Technologies

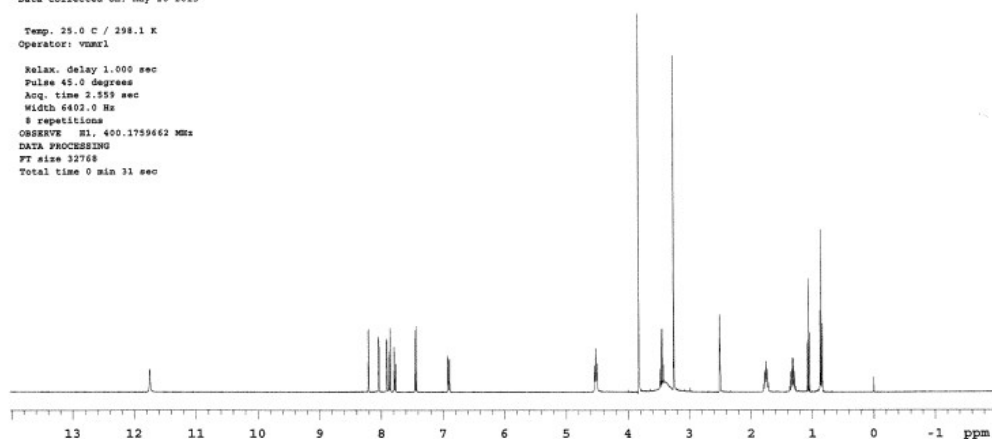

Suppl. Figure 16.  $^1\text{H}$  NMR spectrum of compound 35.

PI-122

Sample Name:  
PI-122  
Data Collected on:  
mercury400-mercury400  
Archive directory:  
/home/vnmr1/vnmrnsya/data  
Sample directory:  
PI-122\_20150623\_01  
FidFile: PROTON\_02

Pulse Sequence: PROTON (s2pul)  
Solvent: dmsc  
Data collected on: Jun 23 2015

Operator: vnmr1

Relax. delay 1.000 sec  
Pulse 45.0 degrees  
Acq. time 2.559 sec  
Width 6402.0 Hz  
8 repetitions  
OBSERVE F1, 400.1759643 MHz  
DATA PROCESSING  
FT size 32768  
Total time 0 min 31 sec

Agilent Technologies

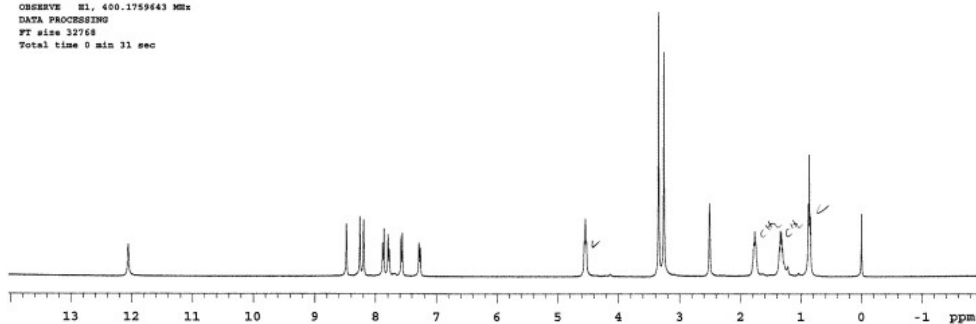

Suppl. Figure 17.  $^1\text{H}$  NMR spectrum of compound 36.

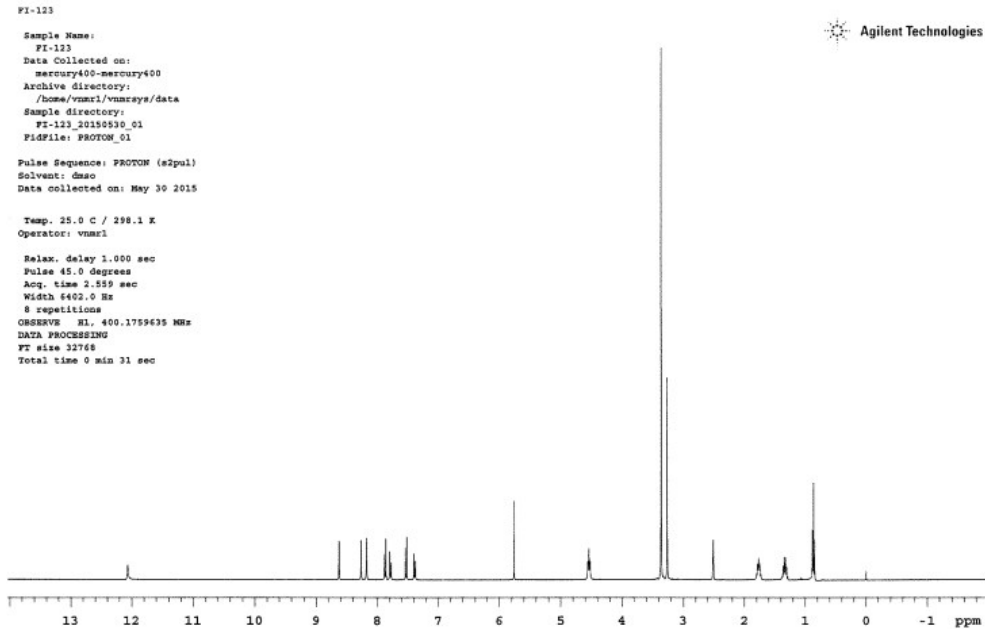

Suppl. Figure 18. <sup>1</sup>H NMR spectrum of compound 37.

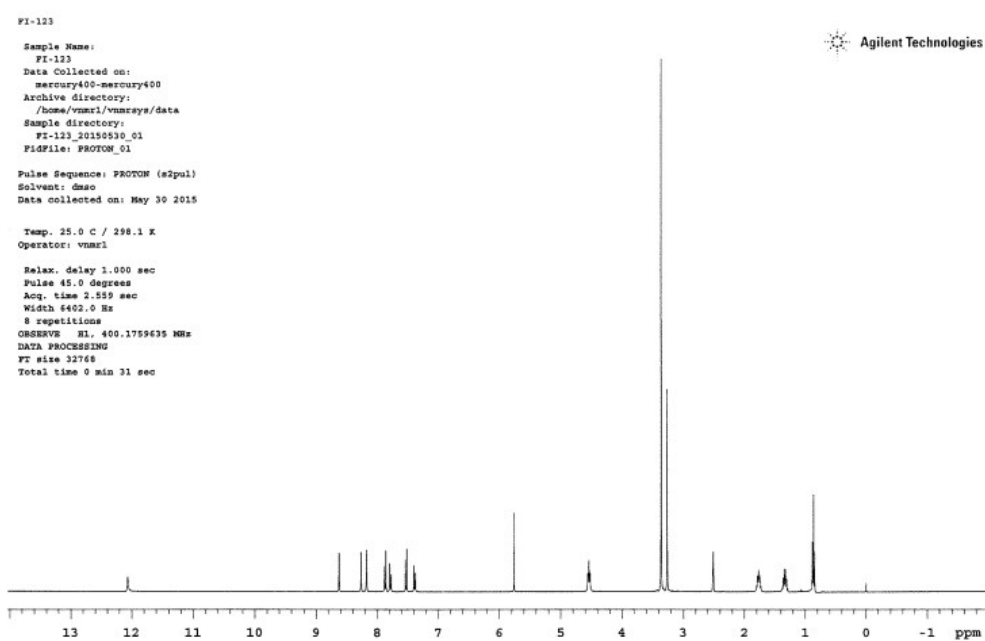

Suppl. Figure 19. <sup>1</sup>H NMR spectrum of compound 38.



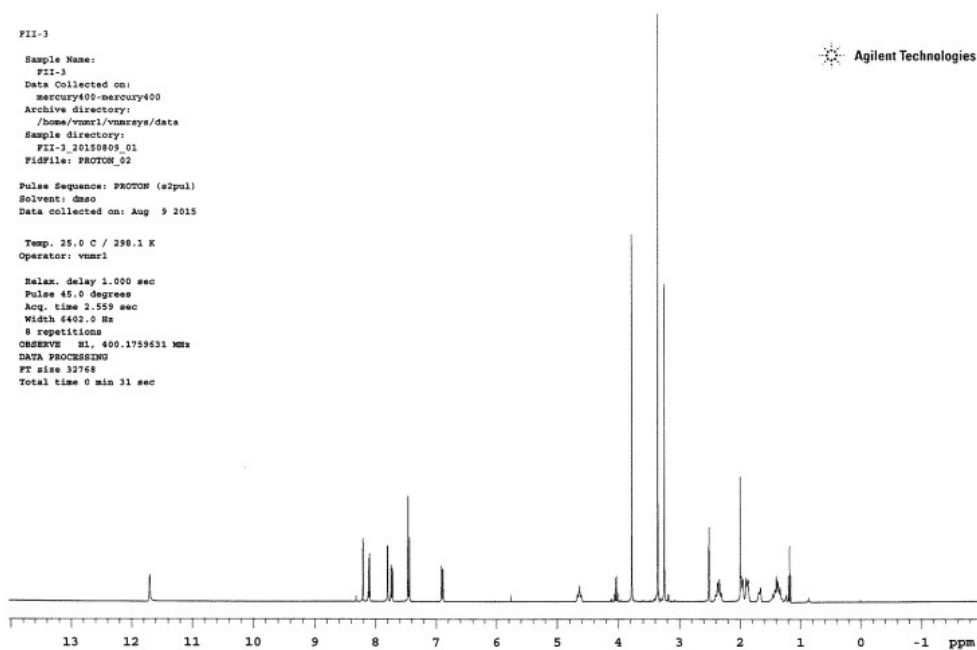

Suppl. Figure 20.  $^1\text{H}$  NMR spectrum of compound 39.

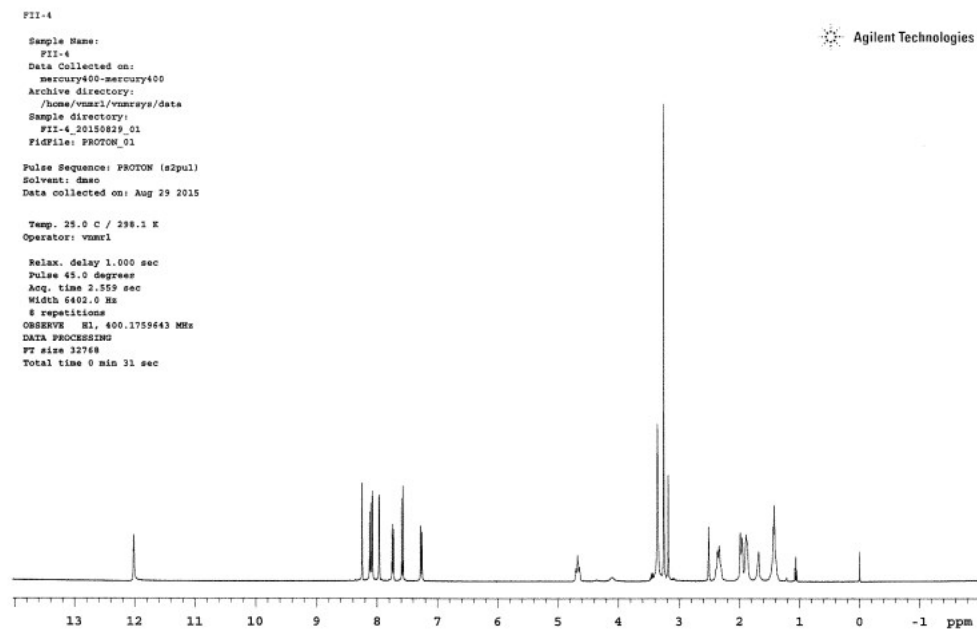

Suppl. Figure 21.  $^1\text{H}$  NMR spectrum of compound 40.

F11-5  
Sample Name:  
F11-5  
Data Collected on:  
mercury400-mercury400  
Archive directory:  
/home/vnmr1/vnmrnsys/data  
Sample directory:  
F11-5\_20150708\_01  
Fidfile: PROTON\_02  
Pulse Sequence: PROTON (s2pul)  
Solvent: dmsc  
Data collected on: Jul 8 2015  
Temp. 25.0 C / 298.1 K  
Operator: vnmr1  
Relax. delay 1.000 sec  
Pulse 45.0 degrees  
Acq. time 2.559 sec  
Width 6402.0 Hz  
8 repetitions  
OBSERVE H1, 400.1759761 MHz  
DATA PROCESSING  
F2 size 32768  
Total time 0 min 31 sec

Agilent Technologies

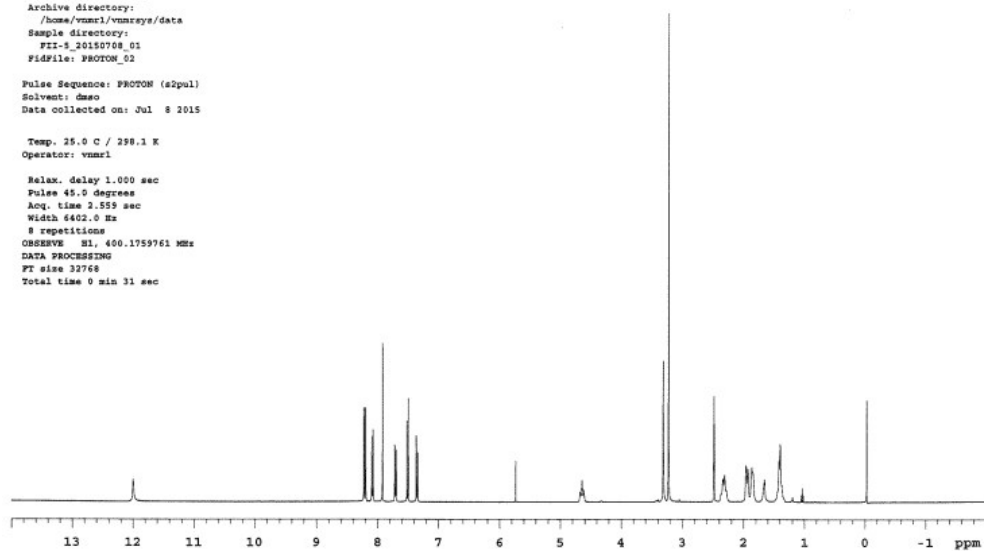

Suppl. Figure 22. <sup>1</sup>H NMR spectrum of compound 41.

F11-8  
Sample Name:  
F11-8  
Data Collected on:  
mercury400-mercury400  
Archive directory:  
/home/vnmr1/vnmrnsys/data  
Sample directory:  
F11-8\_20150720\_01  
Fidfile: PROTON\_02  
Pulse Sequence: PROTON (s2pul)  
Solvent: dmsc  
Data collected on: Jul 20 2015  
Operator: vnmr1  
Relax. delay 1.000 sec  
Pulse 45.0 degrees  
Acq. time 2.559 sec  
Width 6402.0 Hz  
8 repetitions  
OBSERVE H1, 400.1759674 MHz  
DATA PROCESSING  
F2 size 32768  
Total time 0 min 31 sec

Agilent Technologies

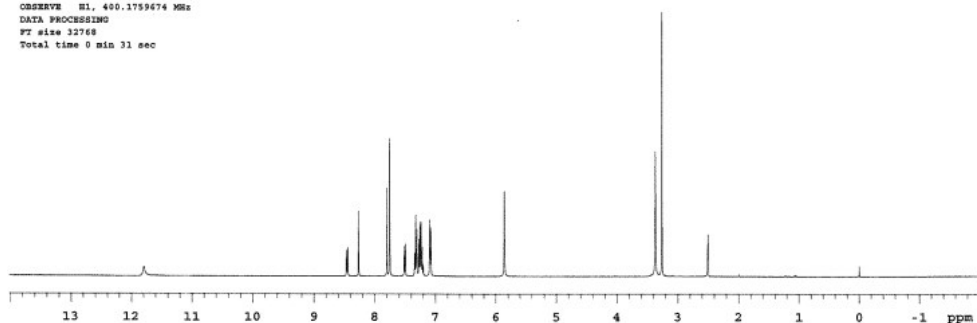

Suppl. Figure 23. <sup>1</sup>H NMR spectrum of compound 42.

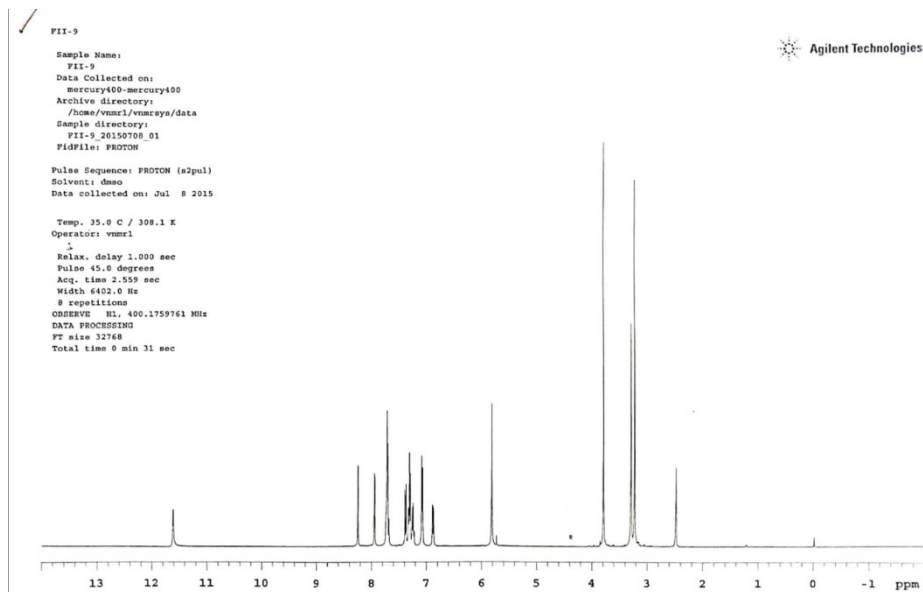

Suppl. Figure 24.  $^1\text{H}$  NMR spectrum of compound 43.

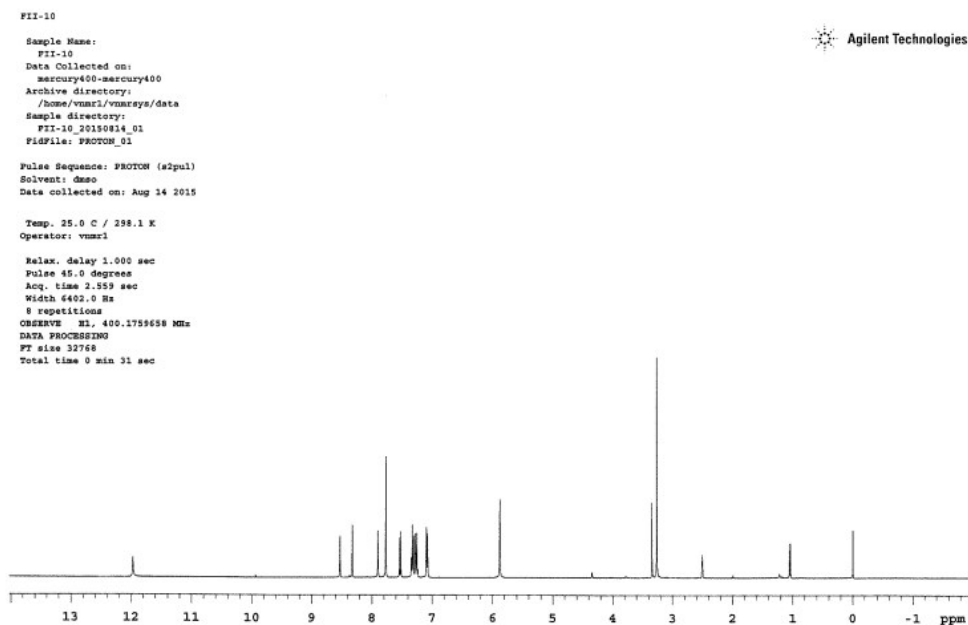

Suppl. Figure 25.  $^1\text{H}$  NMR spectrum of compound 44.

F11-20  
Sample Name:  
F11-20  
Data Collected on:  
mercury400-mercury400  
Archive directory:  
/home/vnmr1/vnmrsys/data  
Sample directory:  
F11-20\_20150809\_01  
FidFile: PROTON\_02  
Pulse Sequence: PROTON (s2pul)  
Solvent: dmsd  
Data collected on: Aug 9 2015  
Temp. 25.0 C / 298.1 K  
Operator: vnmr1  
Relax. delay 1.000 sec  
Pulse 45.0 degrees  
Acq. time 2.559 sec  
Width 6402.0 Hz  
8 repetitions  
OBSERVE H1, 400.1759666 MHz  
DATA PROCESSING  
FT size 32768  
Total time 0 min 31 sec

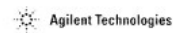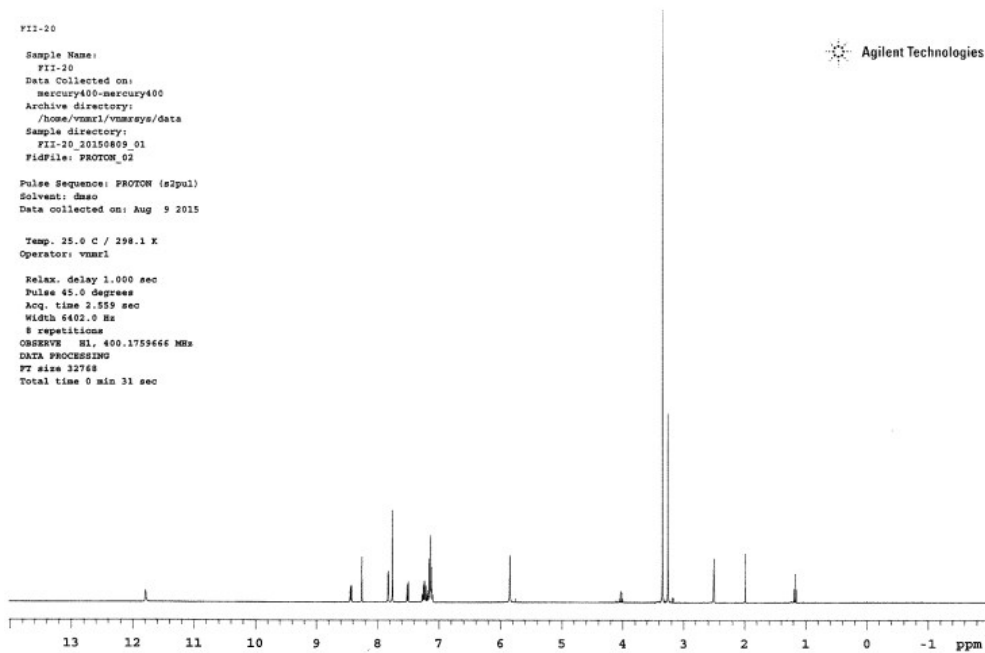

Suppl. Figure 26.  $^1\text{H}$  NMR spectrum of compound 45.

F11-22  
Sample Name:  
F11-22  
Data Collected on:  
mercury400-mercury400  
Archive directory:  
/home/vnmr1/vnmrsys/data  
Sample directory:  
F11-22\_20150811\_01  
FidFile: PROTON\_02  
Pulse Sequence: PROTON (s2pul)  
Solvent: dmsd  
Data collected on: Aug 11 2015  
Temp. 25.0 C / 298.1 K  
Operator: vnmr1  
Relax. delay 1.000 sec  
Pulse 45.0 degrees  
Acq. time 2.559 sec  
Width 6402.0 Hz  
8 repetitions  
OBSERVE H1, 400.1759716 MHz  
DATA PROCESSING  
FT size 32768  
Total time 0 min 31 sec

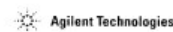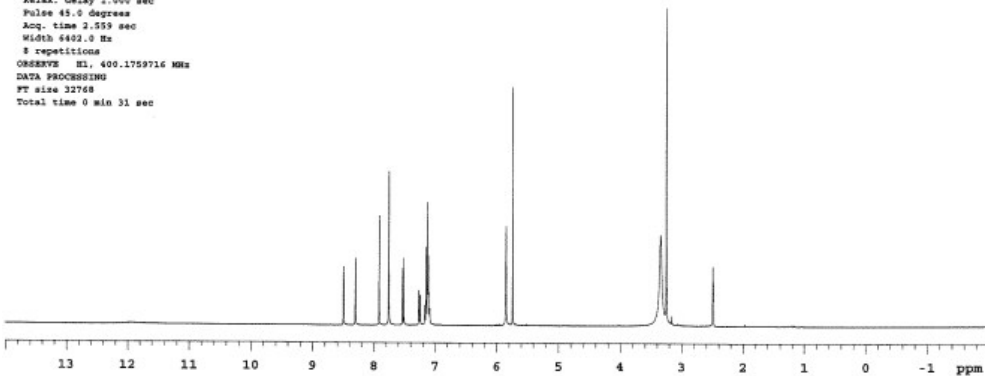

Suppl. Figure 27.  $^1\text{H}$  NMR spectrum of compound 46.

F11-23  
Sample Name:  
F11-23  
Data Collected on:  
mercury400-mercury400  
Archive directory:  
/home/vnmr1/vnmrsys/data  
Sample directory:  
F11-23\_20150805\_01  
Fidfile: PROTON\_02  
Pulse Sequence: PROTON (s2pull)  
Solvent: dmsc  
Data collected on: Aug 5 2015  
Temp. 25.0 C / 298.1 K  
Operator: vnmr1  
Relax. delay 1.000 sec  
Pulse 45.0 degrees  
Acq. time 2.559 sec  
Width 6402.0 Hz  
# repetitions  
OBSERVE H1, 400.1759761 MHz  
DATA PROCESSING  
FT size 32768  
Total time 0 min 31 sec

Agilent Technologies

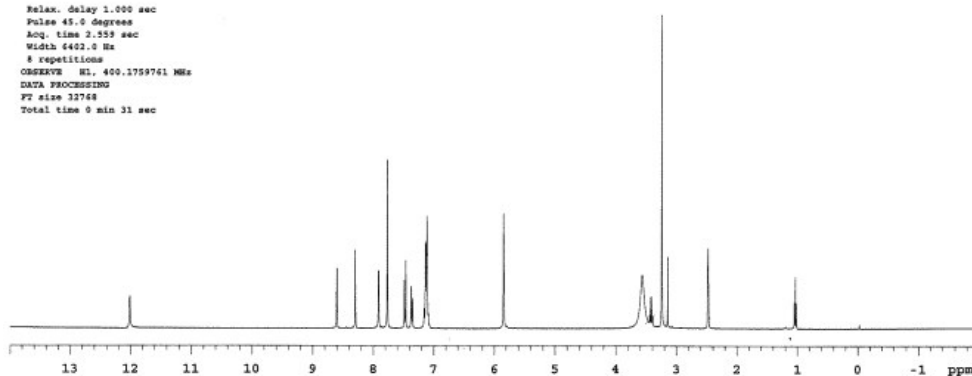

Suppl. Figure 28.  $^1\text{H}$  NMR spectrum of compound 47.

F11-24  
Sample Name:  
F11-24  
Data Collected on:  
mercury400-mercury400  
Archive directory:  
/home/vnmr1/vnmrsys/data  
Sample directory:  
F11-24\_20150708\_01  
Fidfile: PROTON\_02  
Pulse Sequence: PROTON (s2pull)  
Solvent: dmsc  
Data collected on: Jul 8 2015  
Temp. 25.0 C / 298.1 K  
Operator: vnmr1  
Relax. delay 1.000 sec  
Pulse 45.0 degrees  
Acq. time 2.559 sec  
Width 6402.0 Hz  
# repetitions  
OBSERVE H1, 400.1759761 MHz  
DATA PROCESSING  
FT size 32768  
Total time 0 min 31 sec

Agilent Technologies

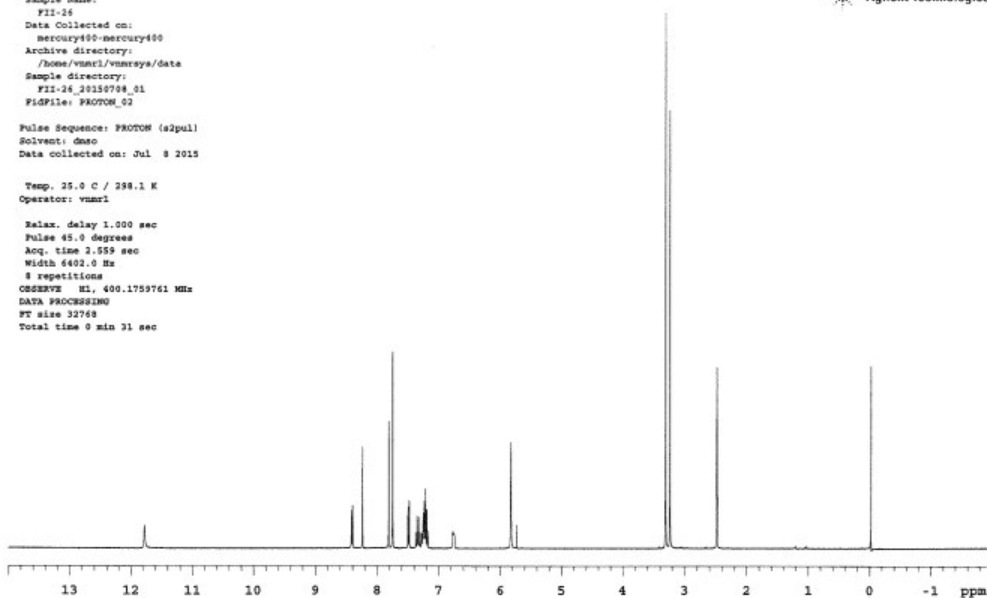

Suppl. Figure 29.  $^1\text{H}$  NMR spectrum of compound 48.

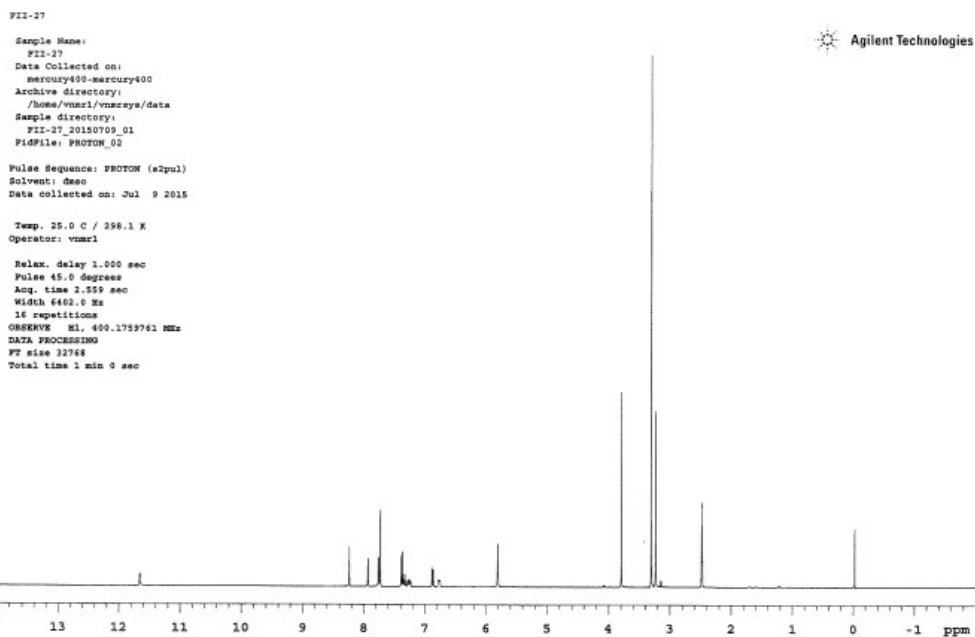

Suppl. Figure 30.  $^1\text{H}$  NMR spectrum of compound 49.

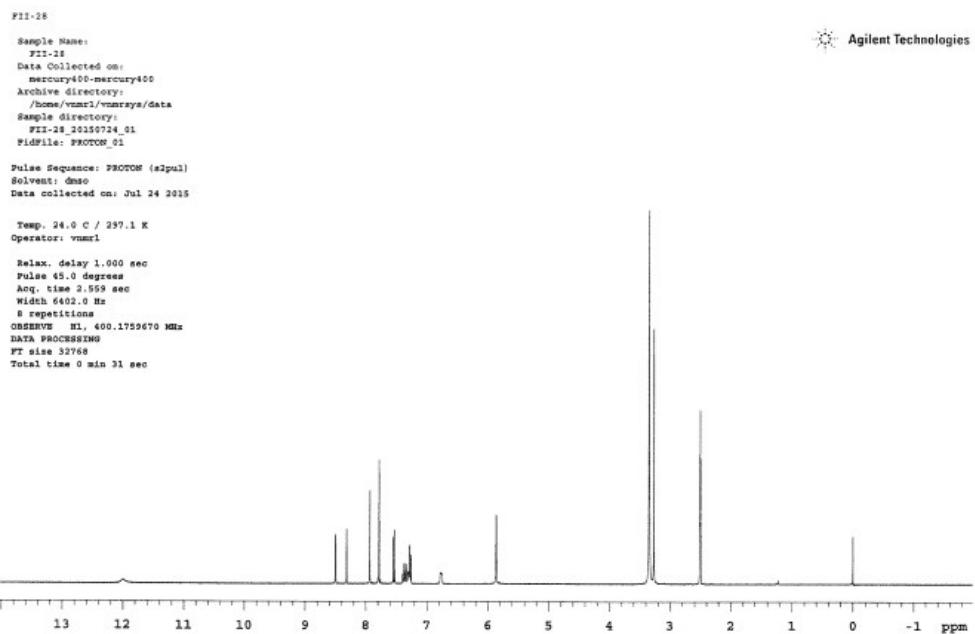

Suppl. Figure 31.  $^1\text{H}$  NMR spectrum of compound 50.

F11-29

Sample Name:  
F11-29  
Data Collected on:  
mercury400-mercury400  
Archive directory:  
/home/vmar1/vmarsys/data  
Sample directory:  
F11-29\_20150724\_01  
Fidfile: PROTON\_01

Pulse Sequence: PROTON (a2pul)  
Solvent: dmsc  
Data collected on: Jul 24 2015

Temp. 24.0 C / 297.1 K  
Operator: vmar1

Relax. delay 1.000 sec  
Pulse 45.0 degrees  
Acq. time 2.559 sec  
Width 6402.0 Hz  
9 repetitions  
OBSERVE M1, 400.1759074 MHz  
DATA PROCESSING  
FT size 32768  
Total time 0 min 31 sec

Agilent Technologies

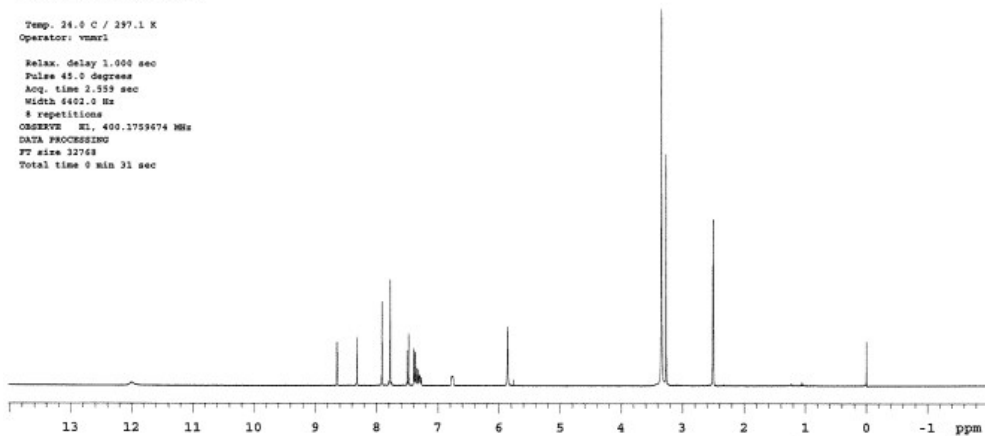

Suppl. Figure 32. <sup>1</sup>H NMR spectrum of compound 51.

F11-14

Sample Name:  
F11-14  
Data Collected on:  
mercury400-mercury400  
Archive directory:  
/home/vmar1/vmarsys/data  
Sample directory:  
F11-14\_20150829\_01  
Fidfile: PROTON\_02

Pulse Sequence: PROTON (a2pul)  
Solvent: dmsc  
Data collected on: Aug 29 2015

Temp. 25.0 C / 298.1 K  
Operator: vmar1

Relax. delay 1.000 sec  
Pulse 45.0 degrees  
Acq. time 2.559 sec  
Width 6402.0 Hz  
9 repetitions  
OBSERVE M1, 400.1759761 MHz  
DATA PROCESSING  
FT size 32768  
Total time 0 min 31 sec

Agilent Technologies

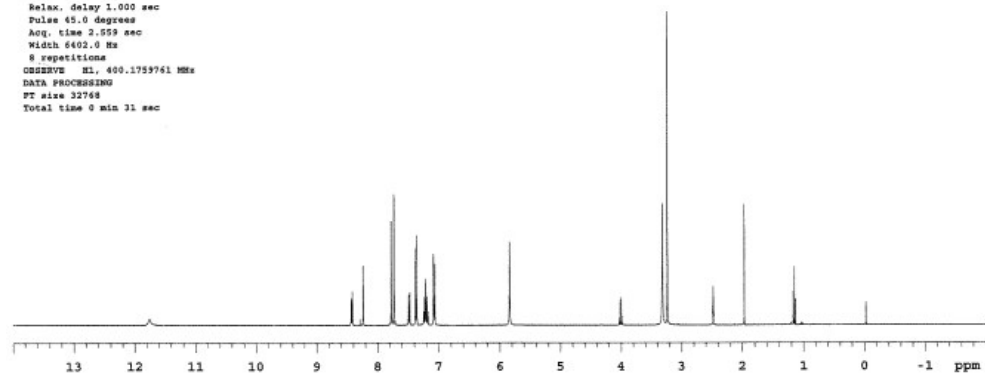

Suppl. Figure 33. <sup>1</sup>H NMR spectrum of compound 52.

F11-15

Sample Name:  
F11-15  
Data Collected on:  
mercury400-mercury400  
Archive directory:  
/home/vnmr1/vnmrsys/data  
Sample directory:  
F11-15\_20151002\_01  
F10File: F10T06\_02  
Pulse Sequence: PROTON (s2pul)  
Solvent: dmsc  
Data collected on: Oct 2 2015

Agilent Technologies

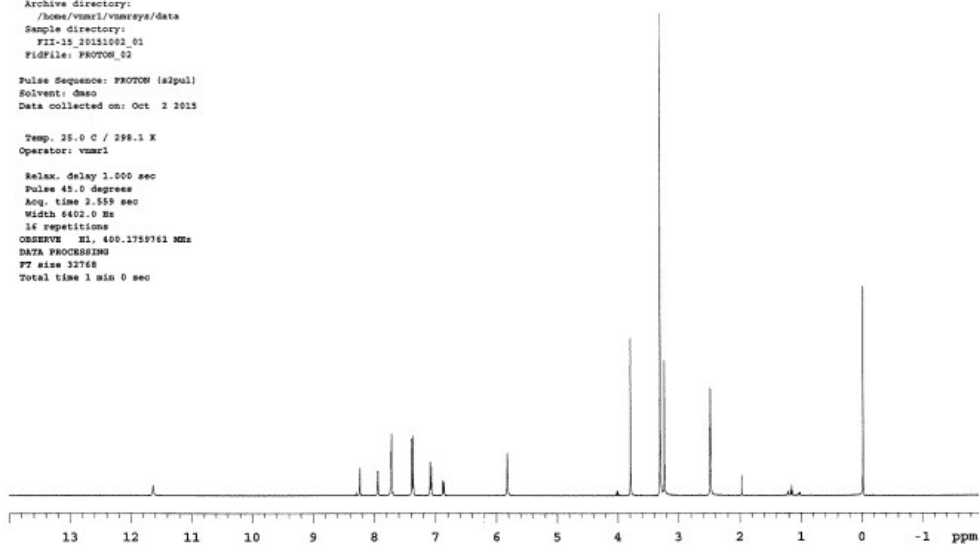

Suppl. Figure 34. <sup>1</sup>H NMR spectrum of compound 53.

F11-37

Sample Name:  
F11-37  
Data Collected on:  
mercury400-mercury400  
Archive directory:  
/home/vnmr1/vnmrsys/data  
Sample directory:  
F11-37\_20151001\_01  
F10File: F10T06\_02  
Pulse Sequence: PROTON (s2pul)  
Solvent: dmsc  
Data collected on: Oct 1 2015

Agilent Technologies

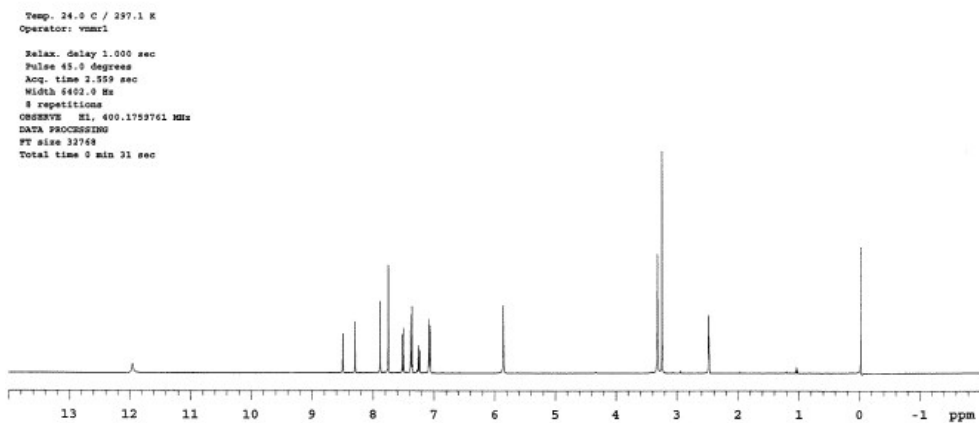

Suppl. Figure 35. <sup>1</sup>H NMR spectrum of compound 54.



F11-38

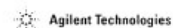

Sample Name:  
F11-38  
Data Collected on:  
mercury400-mercury400  
Archive directory:  
/home/vmari/vmariya/data  
Sample directory:  
F11-38\_20150829\_01  
Fidfile: PROTON\_02  
  
Pulse Sequence: PROTON (s2pul)  
Solvent: dmsc  
Data collected on: Aug 29 2015  
  
Temp. 25.0 C / 298.1 K  
Operator: vmari  
  
Relax. delay 1.000 sec  
Pulse 45.0 degree  
Acq. time 2.559 sec  
Width 6402.0 Hz  
8 repetitions  
OBSERVE EL 400.1759658 MHz  
DATA PROCESSING  
FT size 32768  
Total time 0 min 31 sec

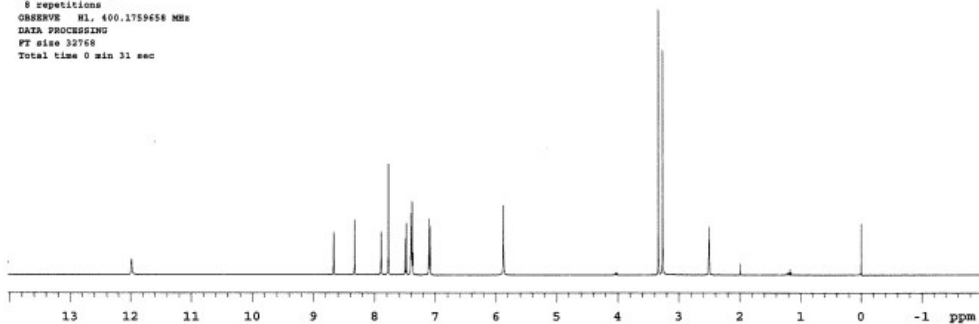

Suppl. Figure 36.  $^1\text{H}$  NMR spectrum of compound 55.

F11-17

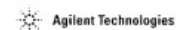

Sample Name:  
F11-17  
Data Collected on:  
mercury400-mercury400  
Archive directory:  
/home/vmari/vmariya/data  
Sample directory:  
F11-17\_20150829\_01  
Fidfile: PROTON\_02  
  
Pulse Sequence: PROTON (s2pul)  
Solvent: dmsc  
Data collected on: Aug 29 2015  
  
Temp. 25.0 C / 298.1 K  
Operator: vmari  
  
Relax. delay 1.000 sec  
Pulse 45.0 degree  
Acq. time 2.559 sec  
Width 6402.0 Hz  
8 repetitions  
OBSERVE EL 400.1759658 MHz  
DATA PROCESSING  
FT size 32768  
Total time 0 min 31 sec

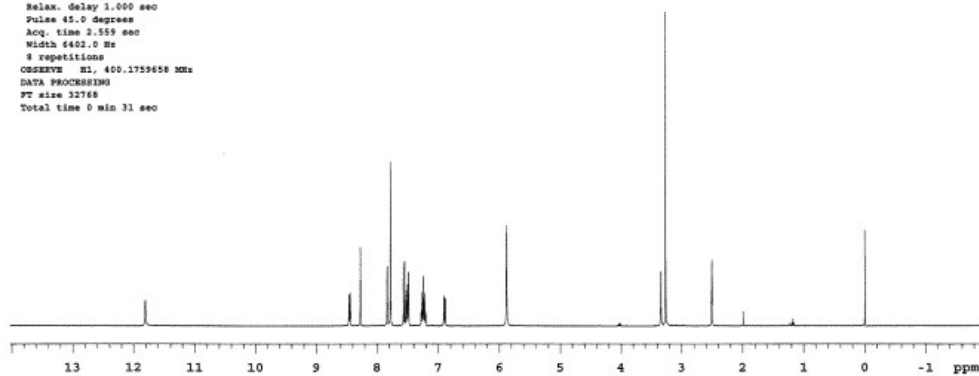

Suppl. Figure 37.  $^1\text{H}$  NMR spectrum of compound 56.

FI-36

Sample Name:  
FI-36  
Data Collected on:  
mercury400-mercury400  
Archive directory:  
/home/vnmr1/vnmrsys/data  
Sample directory:  
FI-36\_20150828\_01  
FidFile: PROTON\_02  
Pulse Sequence: PROTON (s2pul)  
Solvent: dmsc  
Data collected on: Aug 28 2015

Agilent Technologies

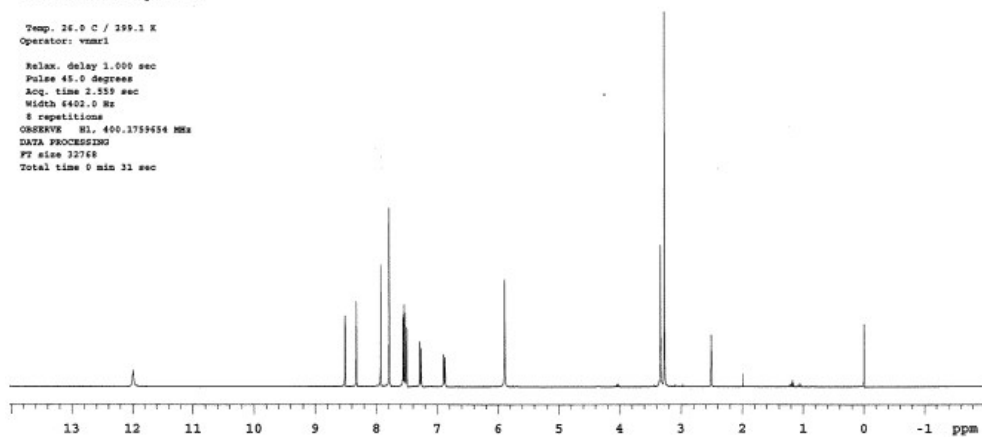

Suppl. Figure 38. <sup>1</sup>H NMR spectrum of compound 57.

FII-40

Sample Name:  
FII-40  
Data Collected on:  
mercury400-mercury400  
Archive directory:  
/home/vnmr1/vnmrsys/data  
Sample directory:  
FII-40\_20151002\_01  
FidFile: PROTON\_02  
Pulse Sequence: PROTON (s2pul)  
Solvent: dmsc  
Data collected on: Oct 2 2015

Agilent Technologies

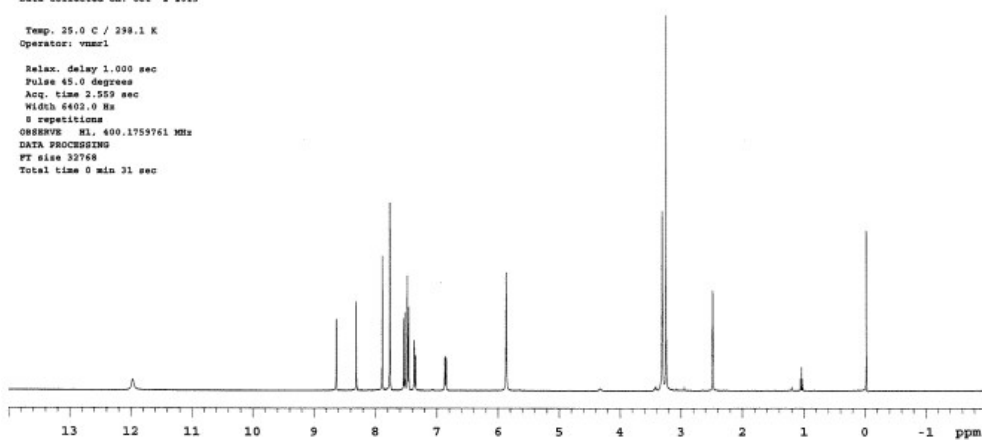

Suppl. Figure 39. <sup>1</sup>H NMR spectrum of compound 58.
